1 **Cell-type specificity of neuronal excitability and morphology in the central**  
2 **amygdala**

3 Anisha P. Adke<sup>1</sup>, Aleisha Khan<sup>1\*</sup>, Hye-Sook Ahn<sup>1\*</sup>, Jordan J. Becker<sup>1</sup>, Torri D. Wilson<sup>1</sup>, Spring  
4 Valdivia<sup>1</sup>, Yae K. Sugimura<sup>1</sup>, Santiago Martinez Gonzalez<sup>1</sup> and Yarimar Carrasquillo<sup>1#</sup>

5  
6 <sup>1</sup>National Center of Complementary and Integrative Health, National Institutes of Health,  
7 Bethesda, MD, United States.

8  
9 \*These authors contributed equally to this work

10

11 #Correspondence

12 Yarimar Carrasquillo, PhD

13 National Center for Complementary and Integrative Health

14 National Institutes of Health

15 35 Convent Drive

16 Building 35A / Room 1E-410

17 Bethesda, MD 20892

18 Phone: 301-451-8147

19 Fax: 301-480-0772

20 Email: [yarimar.carrasquillo@nih.gov](mailto:yarimar.carrasquillo@nih.gov)

21 **ABSTRACT**

22 Central amygdala (CeA) neurons expressing protein kinase C delta (PKC $\delta^+$ ) or Somatostatin  
23 (Som $^+$ ) differentially modulate diverse behaviors. The underlying features supporting cell-type-  
24 specific function in the CeA, however, remain unknown. Using whole-cell patch-clamp  
25 electrophysiology in acute mouse brain slices and biocytin-based neuronal reconstructions, we  
26 demonstrate that neuronal morphology and relative excitability are two distinguishing features  
27 between Som $^+$  and PKC $\delta^+$  CeLC neurons. Som $^+$  neurons, for example, are more excitable,  
28 compact and with more complex dendritic arborizations than PKC $\delta^+$  neurons. Cell size, intrinsic  
29 membrane properties, and anatomical localization were further shown to correlate with cell-type-  
30 specific differences in excitability. Lastly, in the context of neuropathic pain, we show a shift in the  
31 excitability equilibrium between PKC $\delta^+$  and Som $^+$  neurons, suggesting that imbalances in the  
32 relative output of these cells underlie maladaptive changes in behaviors. Together, our results  
33 identify fundamentally important distinguishing features of PKC $\delta^+$  and Som $^+$  cells that support cell-  
34 type-specific function in the CeA.

35

36 **Keywords:** central amygdala, Somatostatin, protein kinase C delta, intrinsic excitability,  
37 morphology, neuropathic pain

## 38 INTRODUCTION

39 The laterocapsular subdivision of the central nucleus of the amygdala (CeLC) has received  
40 increasing interest due to its widespread function in mediating innate, as well as learned, adaptive  
41 and maladaptive behaviors. Previous work has demonstrated, for example, that the CeLC is  
42 functionally diverse, modulating fear conditioning and aversion (Aggleton, 2000, Davis and  
43 Whalen, 2001), nociception (Zald, 2003, Neugebauer et al., 2004, Veinante et al., 2013), anxiety,  
44 and drug reward and relapse in rodent models (Gilpin et al., 2015, Venniro et al., 2017, Venniro  
45 et al., 2018), to name a few. This diverse span of function is mirrored by the genetic, physiological  
46 and morphological heterogeneity in central amygdala (CeA) neuron subtypes (Schiess et al.,  
47 1999, Martina et al., 1999, Janak and Tye, 2015).

48 Two genetically identified cell types, protein kinase C delta-expressing (PKC $\delta^+$ ) neurons  
49 and somatostatin-expressing (Som $^+$ ) neurons, constitute most CeLC neurons and are largely non-  
50 overlapping (Kim et al., 2017, Li et al., 2013, Wilson et al., 2019). PKC $\delta^+$  and Som $^+$  neurons in  
51 the CeA undergo differential plasticity in the context of behavioral output and they both have  
52 critical, but distinct, functions in the modulation of CeA-dependent behaviors, including fear  
53 conditioning and pain-related behaviors. The activity of PKC $\delta^+$  cells, for example, is reduced  
54 following exposure to a conditioned stimulus after fear conditioning (Haubensak et al., 2010) but  
55 increased following nerve injury (Wilson et al., 2019). In contrast, Som $^+$  cells respond to a threat  
56 stimulus by increasing their activity (Yu et al., 2016) but their excitability is decreased following  
57 nerve injury (Wilson et al., 2019). Consistent with these correlational changes in excitability, both  
58 Som $^+$  and PKC $\delta^+$  CeA neurons have been shown to differentially contribute to fear and pain-  
59 related behaviors (Haubensak et al., 2010, Li et al., 2013, Wilson et al., 2019, Yu et al., 2016).  
60 The underlying features that support cell-type-specific opposite functions of these genetically  
61 distinct CeA neurons, however, remain unclear.

62 Previous studies have demonstrated that the electrophysiological and morphological  
63 properties of CeLC neurons are highly heterogenous across different species (Dumont et al.,

64 2002, Chieng et al., 2006, Schiess et al., 1999, Li and Sheets, 2018). Recent studies have further  
65 shown that CeLC neurons with different firing properties are topographically organized based on  
66 their projection targets (Li and Sheets, 2018), suggesting that heterogeneity of function within the  
67 CeLC might also be anatomically defined.

68 In the present study, we contributed to the growing body of knowledge about the CeLC by  
69 performing a characterization of the electrophysiological and morphological properties of PKC $\delta^+$   
70 and Som $^+$  neurons. Our overarching hypothesis is that these two genetically distinct populations  
71 of CeLC neurons are electrophysiologically and morphologically different. We used whole-cell  
72 patch-clamp electrophysiology in acute mouse brain slices in combination with biocytin-based  
73 morphological reconstructions to characterize and compare the passive and active membrane  
74 properties, as well as the evoked repetitive firing responses, single action potential waveforms  
75 and neuronal morphologies of these two subpopulations of neurons. We further evaluated  
76 whether membrane properties and excitability are dependent on the anatomical localization within  
77 the central amygdala, both at the subnuclei and rostro-caudal levels.

78 Finally, using a mouse model of neuropathic pain, we tested whether perturbations known  
79 to alter CeLC-dependent behavioral outputs would result in a shift in the relative excitability of  
80 these two CeLC cell types. Using this cell-type-specific approach, we demonstrated that PKC $\delta^+$   
81 and Som $^+$  neurons have distinct electrophysiological and morphological properties and that the  
82 differences in the excitability of these cells are occluded in the context of neuropathic pain. Our  
83 combined findings provide an essential foundation for understanding functional heterogeneity  
84 within the CeA.

85

## 86 RESULTS

### 87 **Som<sup>+</sup> cells are more excitable than PKC $\delta$ <sup>+</sup> neurons**

88 Previous studies have shown cell-type-specific alterations in the firing responses of PKC $\delta$ <sup>+</sup> and  
89 Som<sup>+</sup> neurons following fear conditioning or nerve injury (Wilson et al., 2019, Yu et al., 2016,  
90 Ciocchi et al., 2010), demonstrating that plasticity in the firing responses of these cells underlies  
91 changes in behavioral output. Whether the relative excitability of PKC $\delta$ <sup>+</sup> and Som<sup>+</sup> neurons is  
92 different at baseline conditions, however, has not been determined. To do this, we crossed *Prkcd-*  
93 *Cre* or *Sst-Cre* mice with an Ai9 reporter strain to obtain offspring that expressed the fluorescent  
94 protein tdTomato in cells expressing PKC $\delta$  or Somatostatin, respectively (**Figure 1A**). Using an  
95 acute brain slice preparation, we performed whole-cell patch-clamp recordings from a total of 124  
96 visually identified fluorescent neurons in the CeLC, corresponding to PKC $\delta$ <sup>+</sup> and Som<sup>+</sup> cells and  
97 distributed across the rostro-caudal extension of the CeLC (**Figure 1B and Figure 1 - figure**  
98 **supplement 1**). Consistent with previous studies (Chieng et al., 2006, Schiess et al., 1999,  
99 Martina et al., 1999, Lopez de Armentia and Sah, 2004), our experiments revealed that CeLC  
100 neurons display heterogenous firing responses (**Figure 1C**). Thus, three discrete firing  
101 phenotypes are observed: spontaneously active (S), late-firing (LF), and regular-spiking (RS)  
102 neurons. Late-firing neurons are silent at rest, fire repetitively in response to a prolonged (500  
103 ms) depolarizing current injection and have a substantial delay to firing action potentials, while  
104 regular-spiking cells are also silent at rest and fire repetitively in response to depolarizing current  
105 injections but have a much shorter onset to action potentials firing.

106 As illustrated in the representative traces in **Figure 1C**, all three firing types are readily  
107 observed in both PKC $\delta$ <sup>+</sup> and Som<sup>+</sup> CeLC neurons. Quantification of the proportion of cells with  
108 different firing types revealed, however, that the distribution of firing phenotypes is significantly  
109 different between PKC $\delta$ <sup>+</sup> and Som<sup>+</sup> cells (**Figure 1D**). Of the 75 PKC $\delta$ <sup>+</sup> cells recorded, for  
110 example, the majority (36/75; 48%) are regular-spiking neurons, whereas only 13 of the 49 (27%)

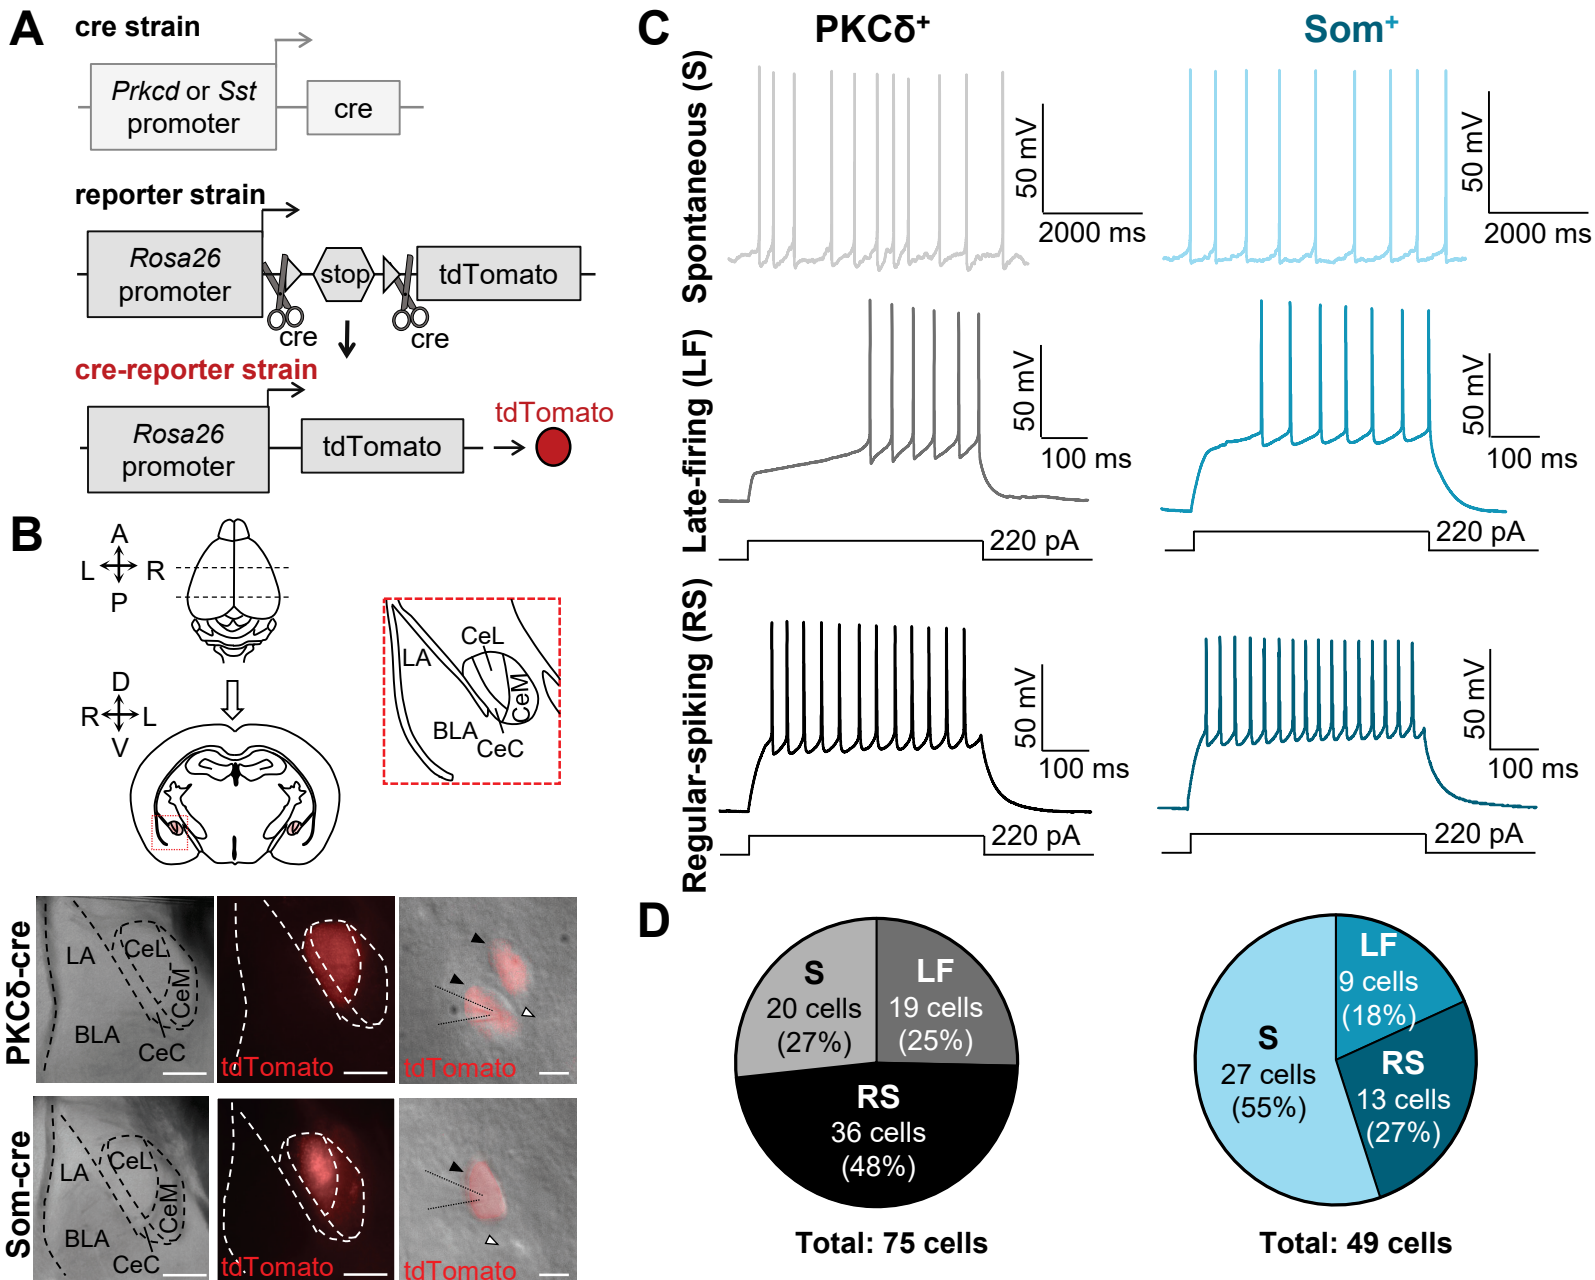

**Figure 1. Firing phenotypes are heterogeneous in PKCδ<sup>+</sup> and Som<sup>+</sup> CeLC neurons.** (A) Strategy for labeling genetically-distinct subpopulations of neurons. *Prkcd*-Cre or *Sst*-Cre mice were crossed with Ai9 reporter mice to produce offspring that express tdTomato fluorescent protein in either PKCδ<sup>+</sup> or Som<sup>+</sup> cells. (B) Acute amygdala slices for patch clamp electrophysiology. Whole brains were extracted and coronally sectioned. Bottom panels are low (left and middle) and high (right) magnification images of CeA slices. The CeA was visually identified by the distinct fiber bundles outlining the nuclei using differential interference contrast (left). PKCδ<sup>+</sup> cells or Som<sup>+</sup> cells expressing tdTomato (red) were readily seen under fluorescent microscopy (middle and right). Right panels show high magnification images of individual CeLC cells, with fluorescent images and differential interference contrast images overlaid. Black arrows denote fluorescently labeled cells, while white arrows denote unlabeled cells. Scale bars for left and center panel are 200 μm, right panel scale bar is 10 μm. (C) Representative voltage recordings of spontaneously active (S) cells, late-firing (LF) and regular-spiking (RS) PKCδ<sup>+</sup> (left) or Som<sup>+</sup> (right) neurons. (D) Proportions of each firing phenotype within recorded PKCδ<sup>+</sup> and Som<sup>+</sup> cell populations. The distribution of firing phenotypes is significantly ( $p = 0.0055$ , Chi-square test) different between PKCδ<sup>+</sup> and Som<sup>+</sup> cell populations. **See Figure 1 - figure supplement 1.**

111 Som<sup>+</sup> neurons recorded are regular-spiking. In marked contrast, most (27/49; 55%) of the Som<sup>+</sup>  
112 neurons recorded are spontaneously active at rest and only 20 of the 75 (27%) PKC $\delta$ <sup>+</sup> neurons  
113 recorded are spontaneously active. The remaining PKC $\delta$ <sup>+</sup> and Som<sup>+</sup> cells were late-firing and the  
114 proportion of this firing type, relative to the total cells, is similar between PKC $\delta$ <sup>+</sup> (19/75; 25%) and  
115 Som<sup>+</sup> (9/49; 18%) neurons. Together, these results demonstrate that while firing phenotypes are  
116 heterogeneous in PKC $\delta$ <sup>+</sup> and Som<sup>+</sup> CeLC cells, the proportion of cells with different firing types  
117 is cell-type-specific. The greater proportion of spontaneously active Som<sup>+</sup> cells suggests that  
118 these cells have a larger overall output compared to PKC $\delta$ <sup>+</sup> cells in the CeLC.

119 The next set of experiments determined if the relative excitability of PKC $\delta$ <sup>+</sup> and Som<sup>+</sup>  
120 neurons is also different in late-firing and regular-spiking cells. Prolonged (500 ms) depolarizing  
121 current injections elicited repetitive firing in both late-firing and regular-spiking PKC $\delta$ <sup>+</sup> and Som<sup>+</sup>  
122 neurons, with firing responses increasing as a function of the current injection amplitude in all four  
123 cell types (**Figure 2A**). Evoked repetitive firing responses in late-firing and regular-spiking Som<sup>+</sup>  
124 neurons are significantly higher than in late-firing and regular-spiking PKC $\delta$ <sup>+</sup> cells, respectively,  
125 underscoring the notion that Som<sup>+</sup> cell output far outpaces that of PKC $\delta$ <sup>+</sup> neurons in the CeLC.

126 Consistent with the relative hyperexcitable phenotype of Som<sup>+</sup> late-firing neurons,  
127 compared to PKC $\delta$ <sup>+</sup> late-firing cells, the latency to first spike is significantly shorter in these cells,  
128 compared to PKC $\delta$ <sup>+</sup> late-firing cells (**Figure 2B**). The minimal current amplitude that elicits an  
129 action potential (rheobase) as well as the voltage sag in response to a hyperpolarizing current  
130 injection, however, were indistinguishable between PKC $\delta$ <sup>+</sup> and Som<sup>+</sup> late-firing neurons (**Figure**  
131 **2C and Figure 2 – figure supplement 1**).

132 Subthreshold membrane properties, like input resistance and resting membrane potential,  
133 can strongly influence the firing responses of a neuron in response to stimulation. To determine  
134 if subthreshold membrane properties contribute to the relative hyperexcitable phenotype of Som<sup>+</sup>  
135 CeLC neurons, we measured and compared these two parameters in PKC $\delta$ <sup>+</sup> and Som<sup>+</sup> late-firing

136 and regular-spiking neurons. Our analyses showed that input resistance is significantly higher in  
137 Som<sup>+</sup>, compared to PKC $\delta$ <sup>+</sup> late-firing cells (**Figure 2D**), suggesting that differences in  
138 subthreshold conductances might contribute to the differences in excitability observed in PKC $\delta$ <sup>+</sup>  
139 and Som<sup>+</sup> neurons. Notably, the resting membrane potentials of late-firing Som<sup>+</sup> neurons are  
140 significantly hyperpolarized relative to the resting membrane potentials in PKC $\delta$ <sup>+</sup> late-firing cells  
141 (**Figure 2E**), demonstrating that the greater excitability of late-firing Som<sup>+</sup> cells is independent of  
142 the resting membrane potential. In contrast, despite the pronounced differences in evoked firing  
143 responses of Som<sup>+</sup> and PKC $\delta$ <sup>+</sup> regular-spiking neurons, all other passive and active membrane  
144 properties measured are indistinguishable between these two genetically distinct cell types  
145 (**Figure 2F-I and Figure 2 – figure supplement 1**).

146 Together, these results demonstrate that the output of Som<sup>+</sup> cells outpaces that of PKC $\delta$ <sup>+</sup>  
147 cells in the CeLC but that the cellular mechanisms underlying the differences in excitability in  
148 Som<sup>+</sup> and PKC $\delta$ <sup>+</sup> neurons are distinct for late-firing and regular-spiking cells.

#### 149 **PKC $\delta$ <sup>+</sup>, but not Som<sup>+</sup>, CeLC neurons display accommodation of repetitive firing**

150 Inter-spike interval (ISI) accommodation reflects the ability of neurons to sustain the frequency of  
151 firing in response to prolonged depolarizing input. The presence of ISI accommodation has been  
152 previously reported in CeLC neurons and has been widely used as a parameter to classify  
153 neurons in this brain region (Schiess et al., 1999, Hunt et al., 2017, Zhu and Pan, 2004).

154 To further determine if firing properties in the CeLC are cell-type-specific and to gain  
155 additional insight into the mechanisms driving the differences in excitability of these cells, we  
156 measured and compared ISI accommodation between Som<sup>+</sup> and PKC $\delta$ <sup>+</sup> CeLC neurons.  
157 Prolonged (500 ms) current injections elicited repetitive firing in late-firing and regular-spiking  
158 Som<sup>+</sup> and PKC $\delta$ <sup>+</sup> CeLC neurons (**Figure 3A**). Quantification of the number of cells that display  
159 ISI accommodation further revealed that approximately half of the late-firing and half of the  
160 regular-spiking PKC $\delta$ <sup>+</sup> neurons undergo ISI accommodation (**Figure 3B**). In marked contrast,



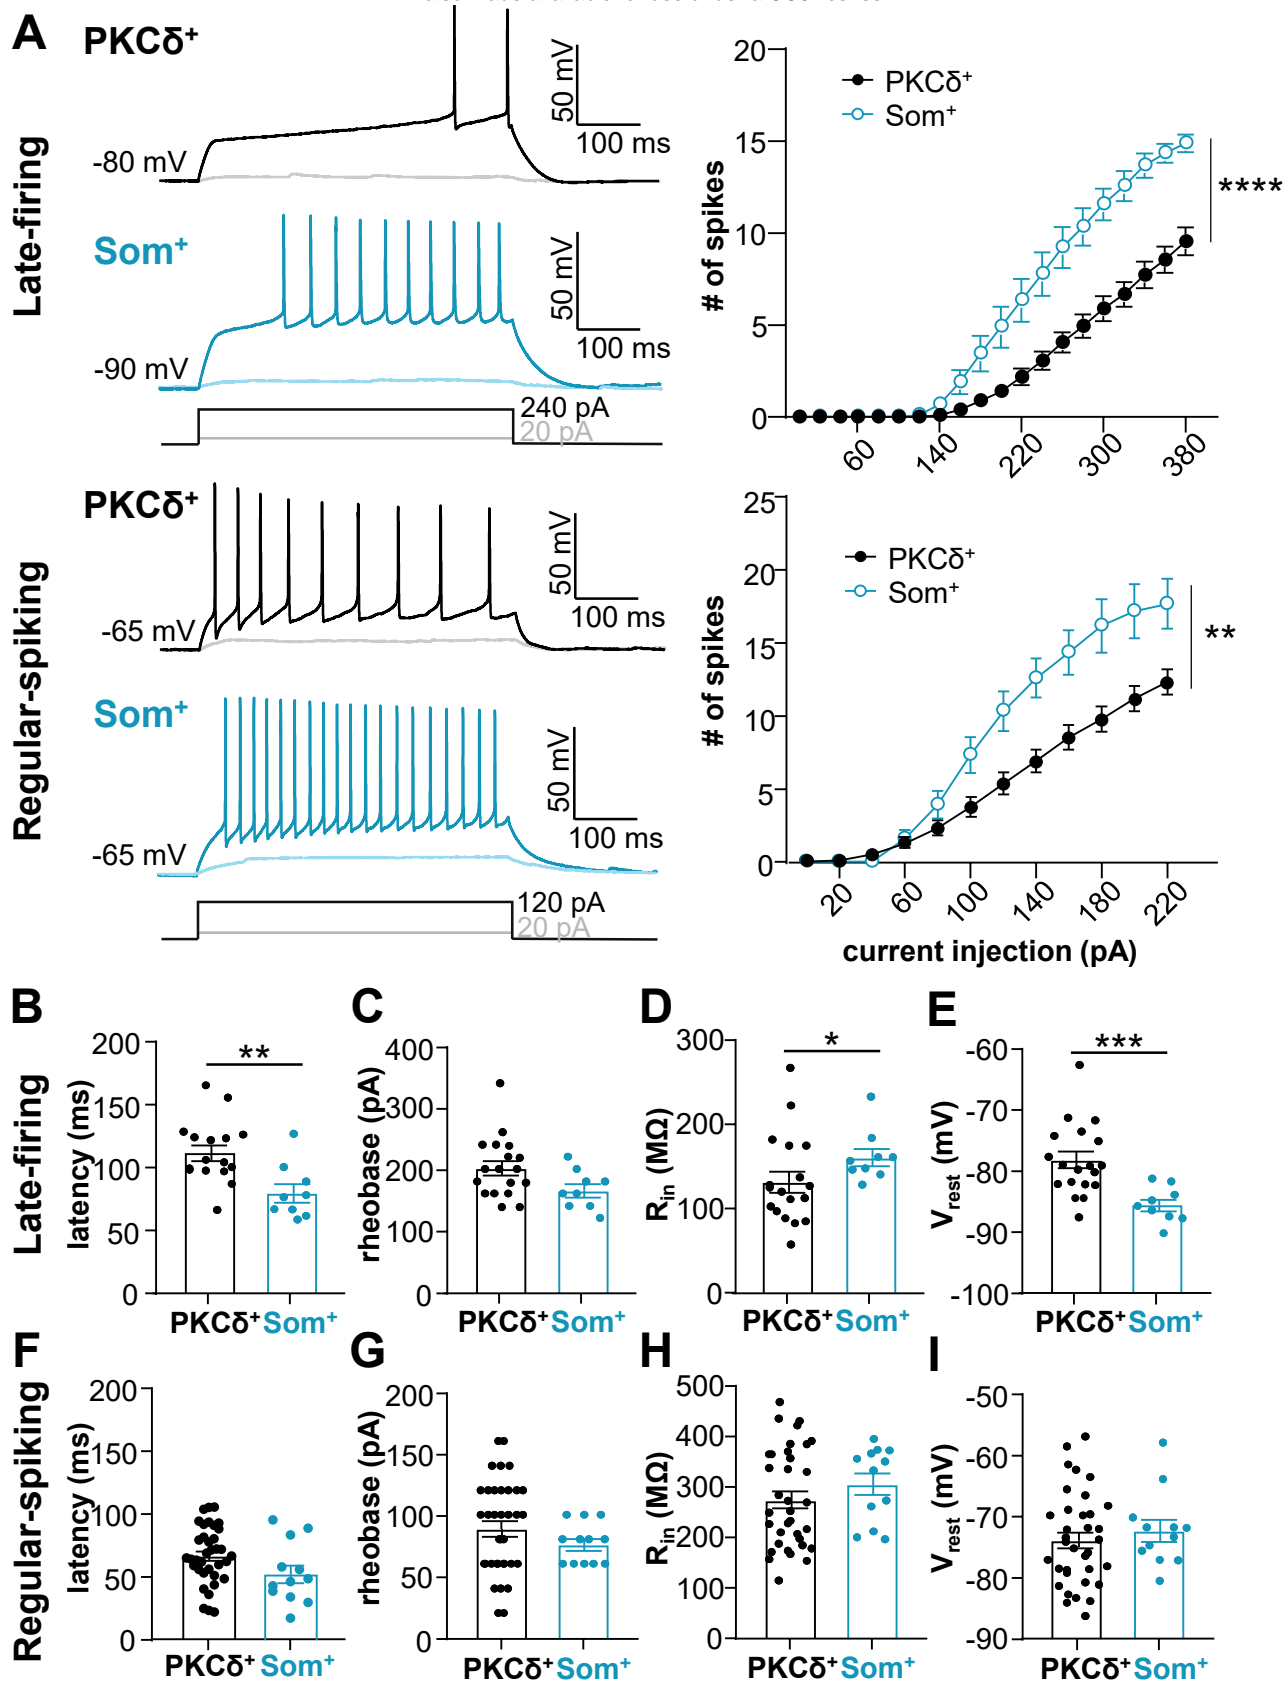

**Figure 2. Som $^+$  CeLC neurons are more excitable than PKC $\delta^+$  cells.** (A) Representative voltage traces of late-firing (top left) or regular-spiking (bottom left) PKC $\delta^+$  cells (black) or Som $^+$  cells (blue) in response to depolarizing current injections. Right panel shows the number of spikes elicited as a function of the current injection amplitude. \*\*\*\* $p < 0.0001$ , \*\* $p < 0.0036$ , two-way ANOVA. (B-F) Latency to first spike (B and F), rheobase (C and G), input resistance ( $R_{in}$ ) (D and H), and resting membrane potential ( $V_{rest}$ ) (E and I) for late-firing (B-E) and regular-spiking (F-I) neurons. \*\* $p = 0.0039$ , unpaired two-tailed t-test; \* $p = 0.0308$ , Mann-Whitney U test; \*\*\* $p = 0.0002$ , unpaired two-tailed t-test with Welch's correction. For PKC $\delta^+$  cells:  $n = 16-19$  cells for late-firing and  $n = 35-36$  regular-spiking. For Som $^+$  cells:  $n = 9$  for late-firing and  $n = 12$  for regular-spiking. All values are expressed as mean  $\pm$  S.E.M.

161 however, only one of the 21 Som<sup>+</sup> neurons analyzed exhibited ISI accommodation in response to  
162 depolarizing current injection. The almost complete lack of ISI accommodation in Som<sup>+</sup> neurons  
163 is consistent with the overall higher output of these CeLC cells, compared to the PKC $\delta$ <sup>+</sup> neurons.  
164 Further analyses of firing responses, as well as passive and active membrane properties, in  
165 accommodating and non-accommodating PKC $\delta$ <sup>+</sup> neurons with either late-firing or regular-spiking  
166 phenotypes revealed that accommodating and non-accommodating neurons are mostly  
167 indistinguishable within firing types (**Table 1**). Thus, for the remainder of this study, data obtained  
168 from accommodating and non-accommodating PKC $\delta$ <sup>+</sup> neurons were pooled and compared to  
169 non-accommodating Som<sup>+</sup> cells.

170 Frequency-dependent changes in spike amplitude, width and afterhyperpolarization  
171 (AHP) are three additional parameters used to measure the ability of neurons to sustain repetitive  
172 firing in response to prolonged depolarizing input. The presence of spike amplitude  
173 accommodation, spike broadening and AHP amplitude accommodation within an evoked train of  
174 action potentials are commonly used to classify and electrophysiologically characterize neurons  
175 in other brain regions, reflecting the repertoire of ion channels and ionic conductance of a cell  
176 (Bean, 2007). It is unknown, however, whether CeLC neurons display frequency-dependent  
177 changes in spike amplitude, width or AHP and, if they do, whether these changes are also cell-  
178 type-specific.

179 Measurements and comparisons of the amplitudes, widths and AHPs of the first and last  
180 spike within an evoked train of action potentials in late-firing and regular-spiking Som<sup>+</sup> and PKC $\delta$ <sup>+</sup>  
181 CeLC neurons demonstrated that all CeLC neurons display robust and significant frequency-  
182 dependent changes in spike amplitude, width and AHP amplitude in response to depolarizing  
183 current injections (**Figure 3C-H**). In all cells analyzed, for example, the amplitude of the last spike  
184 in an evoked train of action potentials is significantly shorter than the amplitude of the first spike  
185 within the same train (**Figure 3C-D**). Notably, while frequency-dependent shortening of the action

186 potential is indistinguishable in PKC $\delta^+$  and Som $^+$  regular-spiking neurons (**Figure 3D**), it is  
187 significantly larger in PKC $\delta^+$  than in Som $^+$  late-firing cells (**Figure 3C**).

188 Quantification of action potential duration (APD) in the first and last spike further  
189 demonstrated that all four different cell types also exhibit robust APD accommodation, but that  
190 frequency-dependent APD broadening is indistinguishable between the different cell types  
191 (**Figure 3E-F**).

192 Finally, analysis of frequency-dependent AHP amplitude accommodation further revealed  
193 that all CeLC cell types exhibit significant AHP amplitude accommodation within an evoked train  
194 of action potentials and that AHP amplitude accommodation is significantly larger in Som $^+$  regular-  
195 spiking than in PKC $\delta^+$  regular-spiking neurons (**Figure 3G-H**).

196 Our combined results, showing that ISI accommodation in response to depolarizing  
197 current injections is selective to PKC $\delta^+$  neurons and that frequency-dependent spike amplitude  
198 accommodation is more robust in PKC $\delta^+$  than in Som $^+$ , neurons demonstrates that the ability of  
199 PKC $\delta^+$  neurons to sustain firing in response to input is lower than that of Som $^+$  cells and that  
200 differences in intrinsic membrane properties at the suprathreshold level contribute to these  
201 differences. These results are consistent with the findings discussed in the previous sections of  
202 this study and suggest that firing phenotypes in the CeLC are cell-type-specific, with Som $^+$  cells  
203 displaying a larger overall output than PKC $\delta^+$  cells in the CeLC.

#### 204 **Action potential repolarization is slower in Som $^+$ than in PKC $\delta^+$ CeLC neurons**

205 Suprathreshold membrane properties, including the membrane potential at which an action  
206 potential is initiated (voltage threshold) and the rates of depolarization and repolarization of  
207 individual action potentials, can also strongly influence neuronal excitability (Bean, 2007). To gain  
208 additional insight into the mechanisms underlying the differences in the excitability of PKC $\delta^+$  and  
209 Som $^+$  cells, we examined the properties of single action potential waveforms elicited by a short (5  
210 ms) depolarizing current injection in these cells (**Figure 4A**).

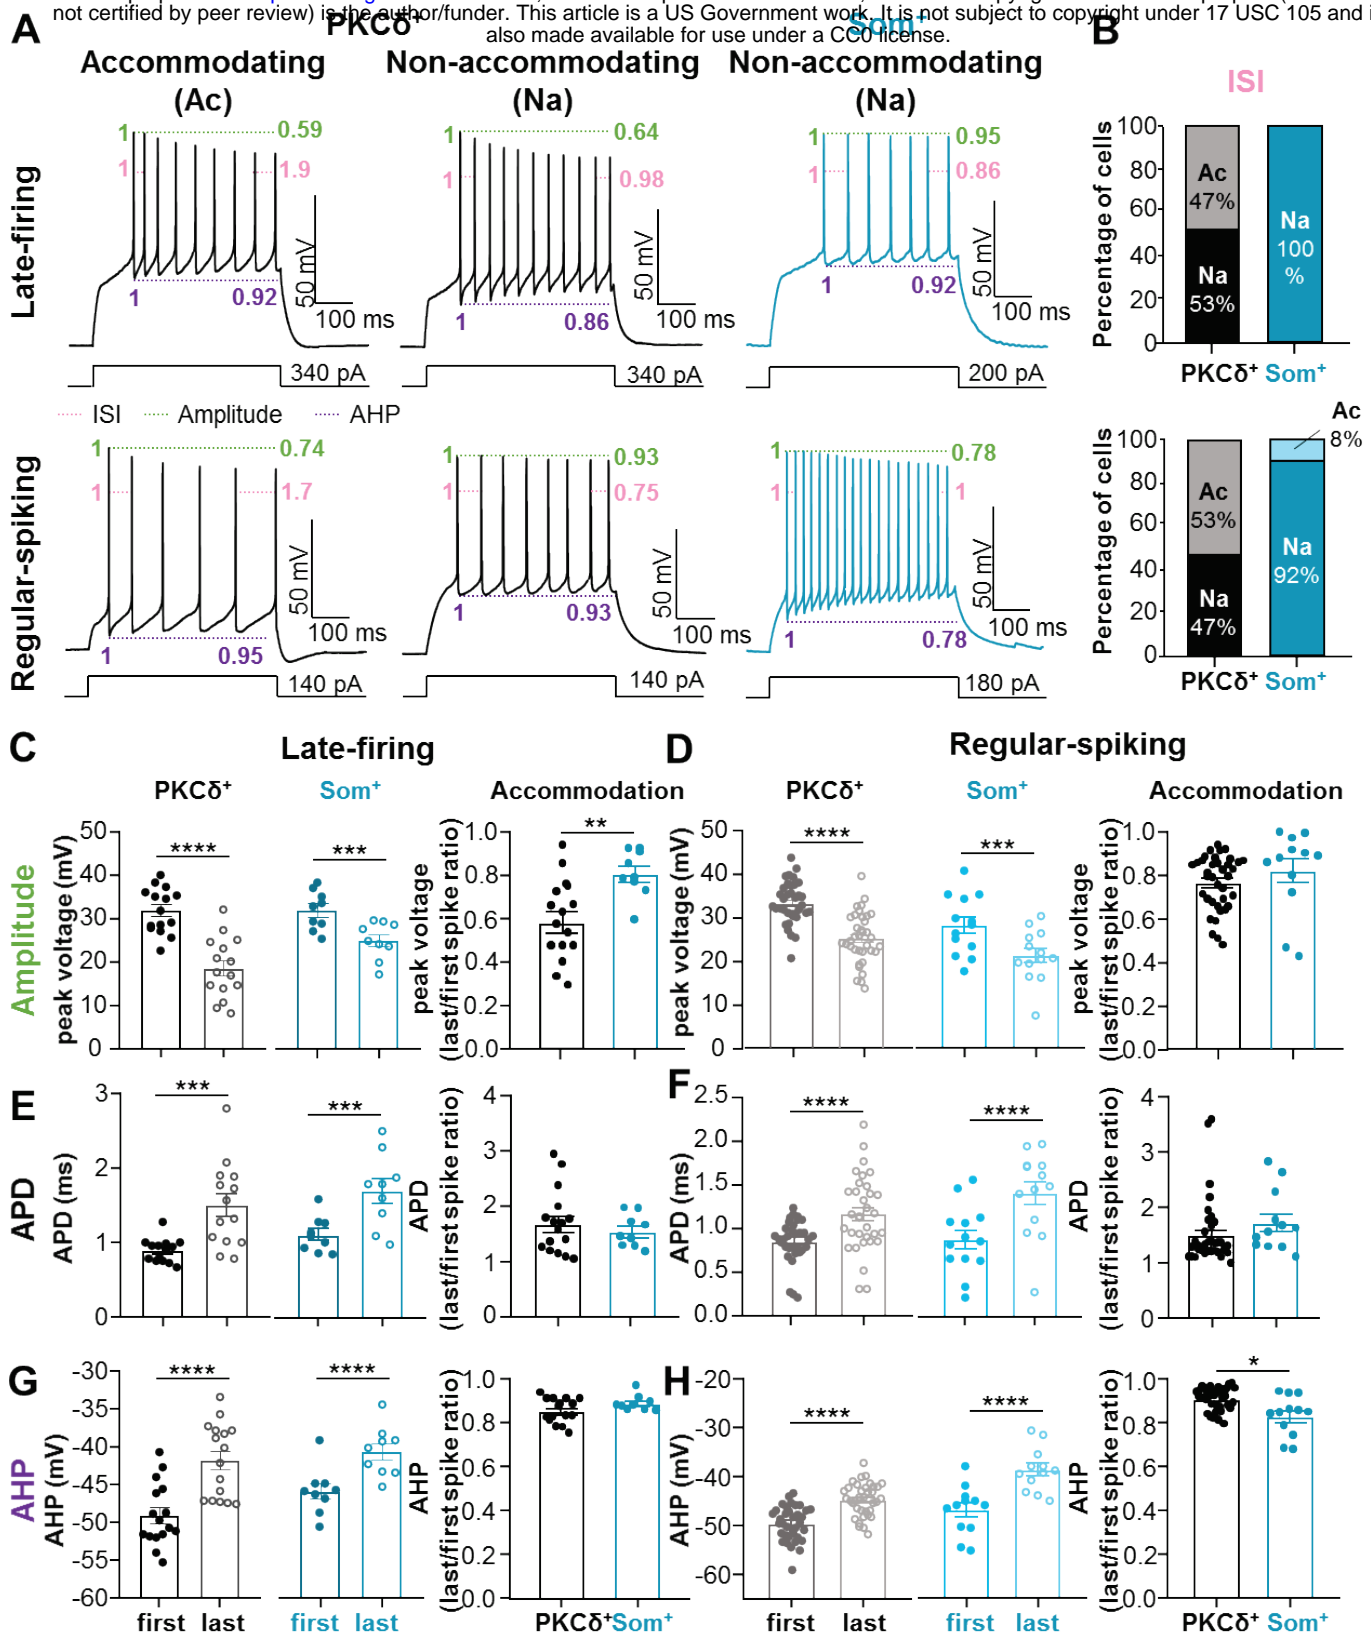

**Figure 3. Accommodation is selective to PKCδ<sup>+</sup>, but not Som<sup>+</sup>, neurons.** (A) Representative voltage records of PKCδ<sup>+</sup> accommodating (Ac, left) and non-accommodating (Na, center) cells and Som<sup>+</sup> Na cells (right) for late firing (top) regular spiking (bottom) cells. Pink annotations depict interspike interval (ISI) accommodation, green denotes spike amplitude accommodation, and purple shows afterhyperpolarization (AHP) amplitude accommodation. (B) The proportions of Na and Ac late-firing and regular-spiking PKCδ<sup>+</sup> and Som<sup>+</sup> cells. (C-H) Spike amplitude accommodation (C-D), action potential duration (APD) accommodation (E-F), and AHP amplitude accommodation (G-H) for late-firing (left) and regular-spiking (right) PKCδ<sup>+</sup> and Som<sup>+</sup> cells. \*\*\*\*p < 0.0001, \*\*\*p < 0.005, paired two-tailed t-test; \*\*p = 0.0034, unpaired two-tailed t-test; \*p = 0.0142, unpaired two-tailed t-test with Welch's correction. For PKCδ<sup>+</sup> cells: n = 14-16 cells for late-firing and n = 33-36 regular-spiking. For Som<sup>+</sup> cells: n = 9 for late-firing and n = 12-13 for regular-spiking. All values are expressed as mean ± S.E.M.

|                                           | Non-accommodating           | Accommodating               | Non-accommodating              | Accommodating                  |
|-------------------------------------------|-----------------------------|-----------------------------|--------------------------------|--------------------------------|
| <b>Passive membrane properties</b>        |                             |                             |                                |                                |
| $V_{rest}$ (mV)                           | $-78.7 \pm 2.0$<br>(n=9)    | $-79.5 \pm 0.8$<br>(n=8)    | $-77.4 \pm 0.8^*$<br>(n=17)    | $-70.6 \pm 1.8^*$<br>(n=18)    |
| $R_{in}$ (M $\Omega$ )                    | $135.5 \pm 23.5$<br>(n=9)   | $127.3 \pm 10.5$<br>(n=8)   | $285.6 \pm 25.6$<br>(n=17)     | $260.6 \pm 21.6$<br>(n=18)     |
| <b>Repetitive firing properties</b>       |                             |                             |                                |                                |
| rheobase (pA)                             | $204.4 \pm 22.05$<br>(n=9)  | $202.2 \pm 9.7$<br>(n=9)    | $92.9 \pm 8.7$<br>(n=17)       | $76.7 \pm 4.8$<br>(n=19)       |
| latency (ms)                              | $110.5 \pm 9.8$<br>(n=8)    | $114.8 \pm 9.3$<br>(n=7)    | $69.9 \pm 5.0$<br>(n=15)       | $58.4 \pm 4.9$<br>(n=15)       |
| ISI accommodation                         | $1.2 \pm 0.1^{**}$<br>(n=8) | $2.0 \pm 0.1^{**}$<br>(n=7) | $1.0 \pm 0.06^{***}$<br>(n=17) | $1.9 \pm 0.06^{***}$<br>(n=18) |
| amplitude accommodation ratio             | $0.6 \pm 0.06$<br>(n=9)     | $0.7 \pm 0.12$<br>(n=7)     | $0.8 \pm 0.01^{\#}$<br>(n=14)  | $0.7 \pm 0.03^{\#}$<br>(n=19)  |
| width accommodation ratio                 | $1.7 \pm 0.2$<br>(n=9)      | $1.7 \pm 0.2$<br>(n=7)      | $1.3 \pm 0.04$<br>(n=17)       | $1.2 \pm 0.05$<br>(n=16)       |
| AHP accommodation ratio                   | $0.8 \pm 0.02$<br>(n=19)    | $0.9 \pm 0.02$<br>(n=7)     | $0.9 \pm 0.01$<br>(n=17)       | $0.9 \pm 0.01$<br>(n=19)       |
| <b>Single action potential properties</b> |                             |                             |                                |                                |
| current threshold (pA)                    | $1708 \pm 177$<br>(n=9)     | $1823 \pm 108$<br>(n=7)     | $808 \pm 71$<br>(n=13)         | $706 \pm 103$<br>(n=18)        |
| voltage threshold (mV)                    | $-36.4 \pm 2.4$<br>(n=9)    | $-34.9 \pm 1.9$<br>(n=7)    | $-39.7 \pm 1.9$<br>(n=13)      | $-41.2 \pm 1.6$<br>(n=18)      |
| rise (ms)                                 | $0.25 \pm 0.02$<br>(n=9)    | $0.26 \pm 0.01$<br>(n=7)    | $0.27 \pm 0.01$<br>(n=13)      | $0.29 \pm 0.02$<br>(n=18)      |
| decay (ms)                                | $0.58 \pm 0.02$<br>(n=9)    | $0.57 \pm 0.02$<br>(n=7)    | $0.79 \pm 0.03$<br>(n=13)      | $0.79 \pm 0.06$<br>(n=18)      |
| width (ms)                                | $1.09 \pm 0.03$<br>(n=9)    | $1.3 \pm 0.02$<br>(n=7)     | $1.2 \pm 0.04$<br>(n=13)       | $1.5 \pm 0.07$<br>(n=18)       |
| AHP (mV)                                  | $-61.0 \pm 1.0$<br>(n=9)    | $-59.2 \pm 0.9$<br>(n=7)    | $-55.0 \pm 1.0$<br>(n=13)      | $-57.4 \pm 0.9$<br>(n=18)      |

**Table 1. Passive membrane, repetitive firing, and single action potential properties of PKC $\delta^+$  non-accommodating and accommodating cells.** All values are expressed as mean  $\pm$  S.E.M. \* $p=0.0063$ , unpaired two-tailed t-test, comparing  $V_{rest}$  in regular-spiking accommodating and non-accommodating PKC $\delta^+$  cells. \*\* $p=0.0003$ , Mann Whitney U test, comparing ISI accommodation in accommodating and non-accommodating late-firing PKC $\delta^+$  cells; \*\*\* $p<0.0001$ , unpaired two-tailed t-test, comparing ISI accommodation in accommodating and non-accommodating regular-spiking PKC $\delta^+$  cells; # $p<0.0001$ , unpaired two-tailed t-test with Welch's correction, comparing amplitude accommodation in regular-spiking PKC $\delta^+$  cells.  $V_{rest}$  = resting membrane potential;  $R_{in}$  = input resistance; ISI = inter-spike interval; AHP = afterhyperpolarization.

211 Consistent with the hyperexcitable phenotype of Som<sup>+</sup> late-firing neurons, the current  
212 amplitude required to induce an action potential (current threshold) is significantly smaller in Som<sup>+</sup>  
213 than PKC $\delta$ <sup>+</sup> late-firing neurons (**Figure 4B**). Analyses of the depolarizing phase of the action  
214 potentials further demonstrated that voltage thresholds and rise times are indistinguishable  
215 between PKC $\delta$ <sup>+</sup> and Som<sup>+</sup> late-firing cells (**Figure 4C-D**). In contrast, decay times are significantly  
216 longer, action potentials significantly prolonged and afterhyperpolarizations significantly  
217 depolarized in Som<sup>+</sup>, compared to PKC $\delta$ <sup>+</sup> neurons (**Figure 4E-G**). These combined results  
218 demonstrate that while the depolarizing phase of action potentials is indistinguishable in PKC $\delta$ <sup>+</sup>  
219 and Som<sup>+</sup> late-firing CeLC neurons, the repolarizing phase is slower in Som<sup>+</sup> than in PKC $\delta$ <sup>+</sup> late-  
220 firing CeLC cells, likely contributing to the hyperexcitable phenotype observed in these cells.

221 Consistent with the indistinguishable subthreshold membrane properties and  
222 accommodation observed in PKC $\delta$ <sup>+</sup> and Som<sup>+</sup> regular-spiking CeLC neurons (**Figures 2 and 3**),  
223 most of the suprathreshold membrane properties measured are also indistinguishable in these  
224 cells (**Figure 4H-M**).

225 Together, these results suggest that differences in the intrinsic membrane properties of  
226 PKC $\delta$ <sup>+</sup> and Som<sup>+</sup> late-firing neurons contribute to the greater output of Som<sup>+</sup> late-firing cells. The  
227 differences in excitability in Som<sup>+</sup> and PKC $\delta$ <sup>+</sup> regular-spiking neurons, however, seems to be  
228 independent of the intrinsic membrane properties of the cells, further supporting that the cellular  
229 mechanisms underlying the greater output of Som<sup>+</sup> neurons are distinct for late-firing and regular-  
230 spiking CeLC cells.

### 231 **PKC $\delta$ <sup>+</sup> neurons excitability is dependent on the rostro-caudal anatomical localization** 232 **within the CeLC**

233 Previous studies have shown that genetically distinct cells are differentially distributed throughout  
234 the CeLC (McCullough et al., 2018, Kim et al., 2017, Han et al., 2015, Wilson et al., 2019). As  
235 illustrated in **Figure 5**, and consistent with previous reports, for example, PKC $\delta$ <sup>+</sup> cells are localized



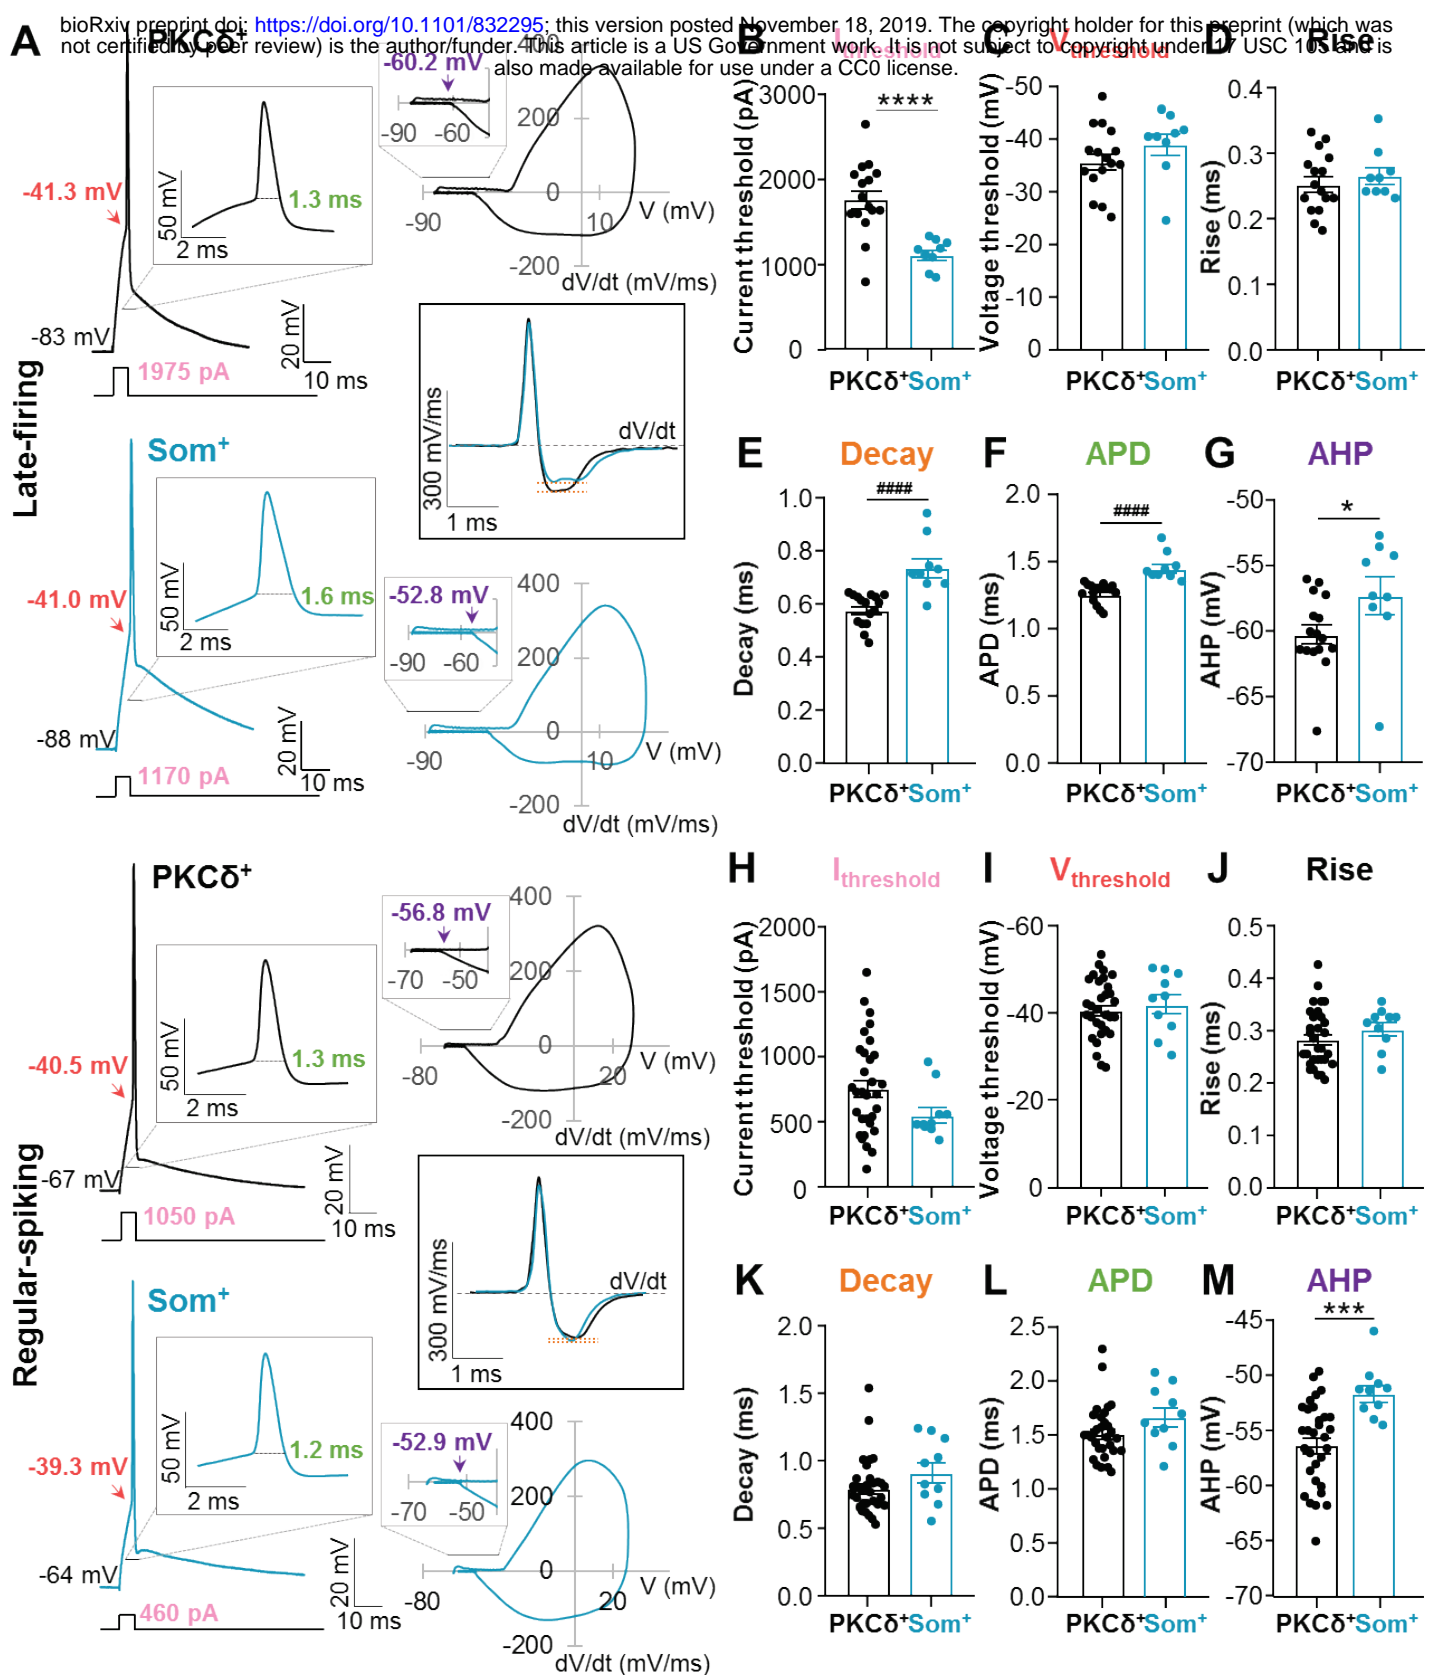

**Figure 4. Slower repolarization in Som $^+$ , than in PKC $\delta^+$ , neurons.** (A) Representative single action potentials (left) elicited by 5 ms depolarizing current injections, phase plots (right) and plots of the first derivatives as a function of time (middle) of late-firing (top) and regular-spiking PKC $\delta^+$  (black) and Som $^+$  (blue) neurons. Insets depict expanded time-scales. Single action potential analyses for late-firing (B-G) and regular-spiking (H-M) PKC $\delta^+$  and Som $^+$  neurons. Current (B and H) and voltage (C and I) thresholds to fire a single action potential. Action potential rise time (D and J), action potential decay time (E and K), action potential duration (APD) (F and L) and afterhyperpolarization (AHP) amplitudes (G and M). \*\*\*\* $p < 0.0001$ , unpaired two-tailed t-test with Welch's correction; ##### $p < 0.0001$ , Mann-Whitney U test; \* $p = 0.0498$ , \*\*\* $p = 0.0008$ , unpaired two-tailed t-test. For PKC $\delta^+$  cells:  $n = 16$  cells for late-firing and  $n = 31$  regular-spiking. For Som $^+$  cells:  $n = 9$  for late firing and  $n = 10$  for regular spiking. All values are expressed as mean  $\pm$  S.E.M.

236 mostly to the lateral (CeL) and capsular (CeC) subdivisions of the CeLC, while Som<sup>+</sup> cells are  
237 predominantly located in the CeL and medial subdivision (CeM) of the CeA (**Figure 5B**). Previous  
238 work has also demonstrated that although both cell types are found throughout the rostro-caudal  
239 axis, Som<sup>+</sup> expression is greater in the anterior amygdala and decreases posteriorly, while PKC $\delta$ <sup>+</sup>  
240 cells are expressed more abundantly in the medial CeLC (**Figure 5B**) (Han et al., 2015, Wilson  
241 et al., 2019).

242         At the anatomical and electrophysiological levels, projection-specific neurons have been  
243 shown to be topographically organized within the CeLC and to exhibit distinct firing responses (Li  
244 and Sheets, 2018). It is unknown, however, whether the firing phenotypes of genetically distinct  
245 cells are dependent on their anatomical localization within the CeLC. We began to evaluate this  
246 by comparing the proportions of the three observed firing types (spontaneous, late-firing and  
247 regular-spiking; see **Figure 1**) in PKC $\delta$ <sup>+</sup> and Som<sup>+</sup> cells localized to different subnuclei or rostro-  
248 caudal levels within the CeLC.

249         Our analyses revealed that firing types of all PKC $\delta$ <sup>+</sup> and Som<sup>+</sup> cells are independent of  
250 their anatomical localization within the CeLC (**Table 2**). Further correlational analyses revealed,  
251 however, that the excitability of PKC $\delta$ <sup>+</sup> regular-spiking neurons in the CeL correlates with the  
252 rostro-caudal localization of these cells (**Figure 6**). Thus, a significant positive correlation is seen  
253 for the number of spikes elicited in response to prolonged (500 ms) depolarizing current injection,  
254 with higher responses in neurons located in the posterior than in the anterior CeL (**Figure 6C**).  
255 Consistently, a significant negative correlation is observed for rheobase and latency to first spike,  
256 with lower values in neurons located in the posterior CeL, compared to neurons in the anterior  
257 CeL (**Figure 6D-E**). Firing responses to depolarizing current injections are indistinguishable in  
258 PKC $\delta$ <sup>+</sup> regular-spiking neurons in the CeC as well as in all PKC $\delta$ <sup>+</sup> late-firing neurons  
259 independently of their location within the rostro-caudal axis (**Figure 6C-E**).



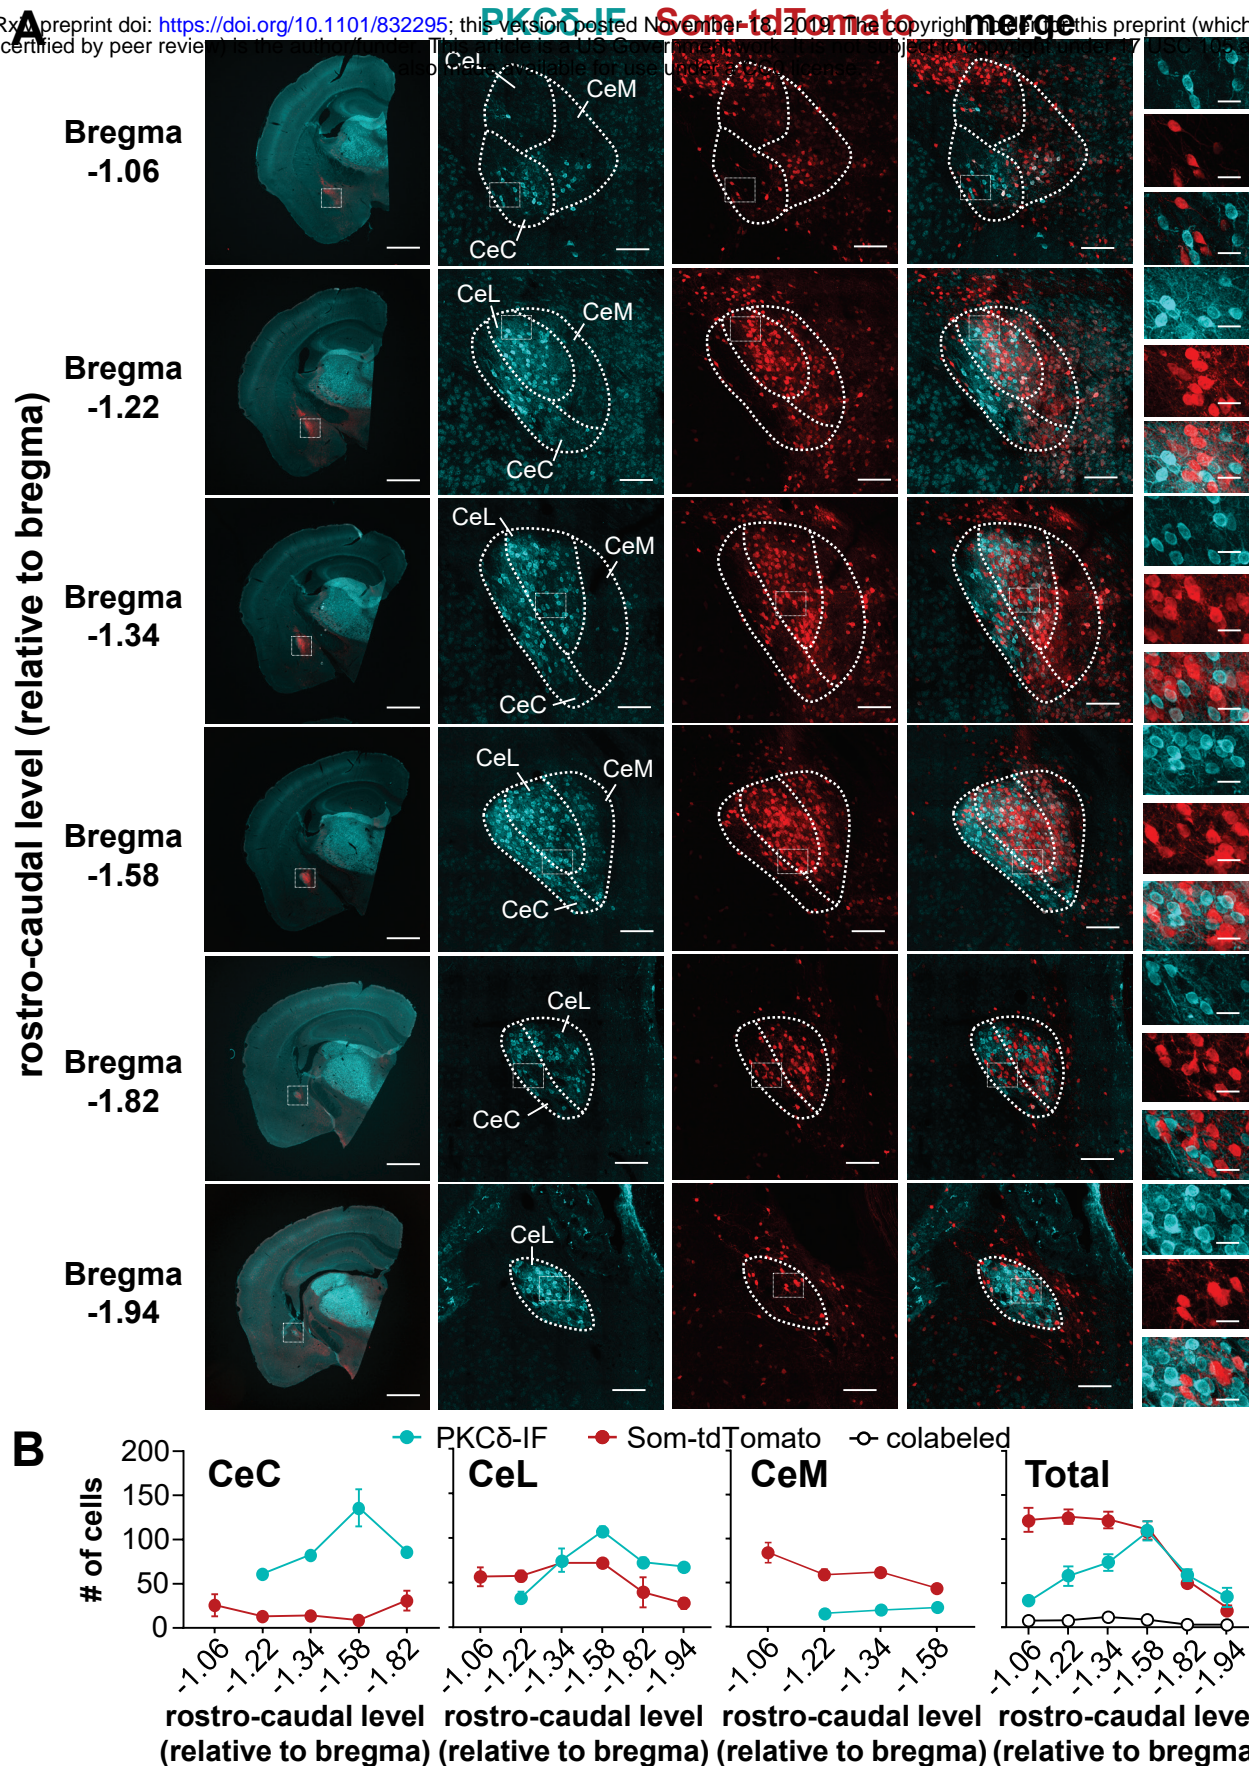

**Figure 5. Rostro-caudal distribution of PKCδ<sup>+</sup> and Som<sup>+</sup> neurons in the CeA.** (A) Representative low (left) and high (second to fifth panels) magnification images of coronal CeA slices immunostained for PKCδ (PKCδ-IF, cyan), with cells positive for Som-tdTomato shown in red. Merged signals between PKCδ-IF and Som-tdTomato are shown in the fourth panels. Rightmost panels depict high-magnification images of areas delineated by the white box. Scale bars are 1 mm for left panels, 100 μm for middle panels, and 20 μm for right panels. (B) Mean ± S.E.M. number of cells positive for PKCδ (cyan), Som (red) or colabeled with both (white circles) in the capsular (CeC), lateral (CeL) or medial (CeM) subdivisions of the CeA, as well as the total number of positive cells, are shown as a function of the rostro-caudal distribution relative to Bregma. n = 1-8 slices per rostro-caudal level from a total of 2-10 mice.

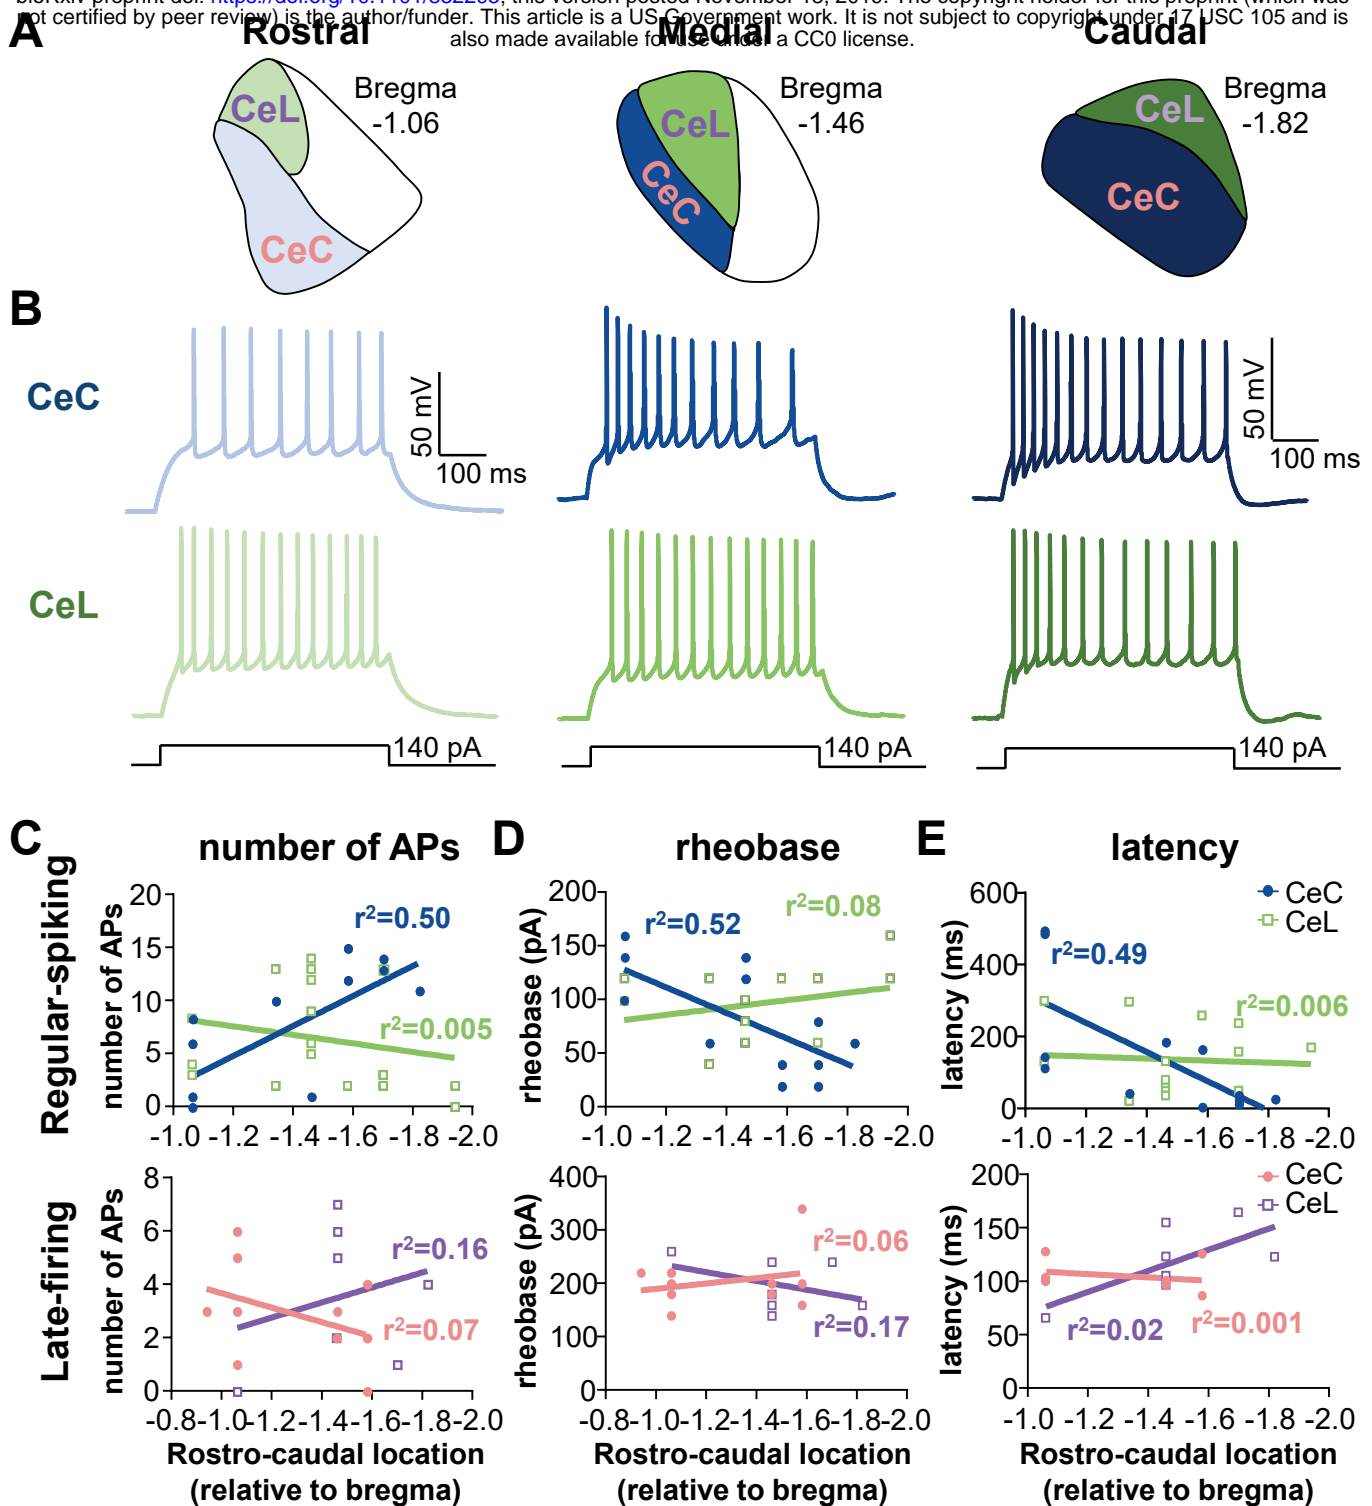

**Figure 6. Firing responses in regular-spiking PKC $\delta$ <sup>+</sup> neurons correlate with rostro-caudal anatomical location within the CeC.**

(A) Schematics of rostral, medial, and caudal regions of the CeL, with the CeL represented in green and purple and the CeC represented in blue and pink. (B) Representative voltage traces of evoked firing responses in regular-spiking PKC $\delta$ <sup>+</sup> neurons in the rostral, medial and caudal CeC (top panel, blue) and CeL (bottom panel, green). (C-E) Correlational plots between the number of evoked action potentials (C), rheobase (D), or latency to fire (E) and the rostro-caudal location of regular spiking (top) and late-firing (bottom) cells. Prolong (500 ms) depolarizing current injections of 140 pA and 240 pA were used to evoke repetitive firing in regular-spiking and late-firing cells, respectively. For regular-spiking neurons in the CeC, there was a positive correlation between the number of evoked action potentials and the rostro-caudal level ( $p = 0.0045$ ,  $r^2 = 0.5031$ , linear regression analysis) and a negative correlation between rheobase ( $p = 0.0036$ ,  $r^2 = 0.5193$ , linear regression analysis) and latency to first spike ( $p = 0.0118$ ,  $r^2 = 0.4858$ , linear regression analysis) with the rostro-caudal level. None of the measured parameters in the CeL and in late-firing cells in the CeC correlated with the rostro-caudal level. For CeL:  $n = 7$  cells for late-firing and  $n = 18$  for regular-spiking. For CeC:  $n = 10$  for late-firing and  $n = 14$  for regular-spiking.

|                             | <b>Anterior</b><br>(number of cells) | <b>Medial</b><br>(number of cells) | <b>Posterior</b><br>(number of cells) |
|-----------------------------|--------------------------------------|------------------------------------|---------------------------------------|
| <b>CeC-PKCδ<sup>+</sup></b> |                                      |                                    |                                       |
| S                           | 4/14                                 | 0/4                                | 2/11                                  |
| LF                          | 5/15                                 | 2/4                                | 3/11                                  |
| RS                          | 6/15                                 | 2/4                                | 6/11                                  |
| <b>CeL-PKCδ<sup>+</sup></b> |                                      |                                    |                                       |
| S                           | 2/8                                  | 5/16                               | 3/12                                  |
| LF                          | 1/8                                  | 4/16                               | 3/12                                  |
| RS                          | 5/8                                  | 7/16                               | 6/12                                  |
| <b>CeC-Som<sup>+</sup></b>  |                                      |                                    |                                       |
| S                           | 1/2                                  | 0/1                                | 1/4                                   |
| LF                          | 0/2                                  | 0/1                                | 2/4                                   |
| RS                          | 1/2                                  | 1/1                                | 1/4                                   |
| <b>CeL-Som<sup>+</sup></b>  |                                      |                                    |                                       |
| S                           | 7/15                                 | 5/8                                | 3/5                                   |
| LF                          | 4/15                                 | 1/8                                | 1/5                                   |
| RS                          | 4/15                                 | 2/8                                | 1/5                                   |

**Table 2. Firing phenotypes of PKCδ<sup>+</sup> and Som<sup>+</sup> CeLC cells by anatomical location.**

Proportions of cells with different firing phenotypes are shown for PKCδ<sup>+</sup> and Som<sup>+</sup> neurons in the capsular (CeC) and lateral (CeL) subdivisions of the central amygdala (CeA). Anterior is defined as the CeA between bregma -0.94 and bregma -1.34; medial as the CeA at bregma -1.46; and posterior as the CeA between bregma -1.58 and bregma -1.94. S = spontaneous; LF = late-firing; RS = regular-spiking; CeC = capsular subdivision of the central amygdala; CeL = lateral subdivision of the central amygdala.

260 Together, these findings demonstrate that anatomical localization within the CeL is yet  
261 another source of heterogeneity that influences neuronal excitability in a cell-type specific manner  
262 in the CeA.

### 263 **PKC $\delta$ <sup>+</sup> and Som<sup>+</sup> neurons are morphologically distinct**

264 It is widely known that neuronal morphology and dendritic spines impact the electrophysiological  
265 properties, and therefore cellular output, of neurons (Stiefel and Sejnowski, 2007, Mainen and  
266 Sejnowski, 1996, Connors and Regehr, 1996). While previous studies have demonstrated that  
267 neurons in the CeLC are both morphologically and electrophysiologically heterogeneous (Martina  
268 et al., 1999, Schiess et al., 1999, Chieng et al., 2006), a correlational link between the morphology  
269 and function of CeLC neurons is still missing.

270 Based on our electrophysiological findings demonstrating that excitability is markedly  
271 different in PKC $\delta$ <sup>+</sup> and Som<sup>+</sup> CeLC neurons, we hypothesized that these two subpopulations of  
272 CeLC cells are also morphologically distinct. To test this hypothesis, we filled some of the neurons  
273 that were used for the electrophysiological studies by including biocytin in the recording pipette  
274 solution (**Figure 7A**). A total of 7 PKC $\delta$ <sup>+</sup> cells and 6 Som<sup>+</sup> biocytin-filled cells were successfully  
275 recovered and reconstructed using this approach (**Figure 7B**).

276 Consistent with previous reports, the morphology of all CeLC neurons recovered  
277 resembled that of medium spiny neurons in the striatum. Notably, however, visual inspection of  
278 the reconstructed biocytin-filled neurons demonstrated that PKC $\delta$ <sup>+</sup> cells display more polarity  
279 (triangular or bipolar) than Som<sup>+</sup> cells, which have dendrites radiating in most directions outwards  
280 from the soma (**supplementary files 1 and 2**). One PKC $\delta$ <sup>+</sup> cell (shown in grey in **Figure 7B**) was  
281 the only exception to this pattern. These qualitative observations suggested that the complexity  
282 of dendritic branching and dendritic length are different between PKC $\delta$ <sup>+</sup> and Som<sup>+</sup> CeLC neurons.

283 To quantify these qualitative differences in neuronal morphology, we performed Sholl  
284 analyses, which allows the quantification and comparison of the number of dendritic intersections



285 as a function of distance from soma. The total number of primary, secondary and tertiary  
286 dendrites, as well as dendritic lengths and spine densities were also quantified in all cells.

287 As illustrated in **Figure 7C**, Sholl analyses revealed that the number of dendritic  
288 intersections is dependent on the distance from soma in both PKC $\delta^+$  and Som $^+$  CeLC neurons,  
289 with maximal number of intersections observed at approximately 50  $\mu\text{m}$  from the soma in both  
290 cell types. The number of dendritic intersections, however, was significantly higher in Som $^+$  than  
291 in PKC $\delta^+$  neurons, demonstrating that dendritic arborizations are more complex in these cells  
292 compared to PKC $\delta^+$  cells. Consistent with the observed polarity of PKC $\delta^+$  cells, the total number  
293 of dendrites was significantly smaller in these neurons compared to the number of dendrites in  
294 Som $^+$  cells (**Figure 7D**). In addition, posthoc analysis revealed that both the number and length  
295 of dendrites increases as a function of branch order in Som $^+$  cells, but it is indistinguishable  
296 between primary, secondary, and tertiary dendrites of PKC $\delta^+$  cells (**Figure 7D-E**). Lastly, while  
297 dendritic spine densities increased as a function of branching order in Som $^+$  neurons, it was  
298 indistinguishable between primary, secondary, and tertiary dendrites in PKC $\delta^+$  cells (**Figure 7F**).

299 Together, these results demonstrate that neuronal morphology differs in genetically  
300 distinct subpopulations of cells in the CeLC, with more complex dendritic branching patterns  
301 observed in Som $^+$  neurons, than in PKC $\delta^+$  cells.

302 The combined results from our electrophysiological and morphological reconstruction of  
303 PKC $\delta^+$  and Som $^+$  CeLC neurons strongly suggest that the morphological properties of PKC $\delta^+$  and  
304 Som $^+$  neurons contribute to the differences in excitability displayed by these two populations of  
305 CeLC cells, with more compact Som $^+$  neurons displaying higher excitability than the less compact  
306 PKC $\delta^+$  cells. To test this hypothesis, we used patch-clamp electrophysiology to measure and  
307 compare whole-cell capacitance in PKC $\delta^+$  and Som $^+$  CeLC neurons. Whole-cell capacitance is  
308 commonly used to measure the total surface area of a cell, and therefore, reflects the size or  
309 compactness of a neuron, with lower whole-cell capacitance seen in smaller, more compact  
310 neurons and vice versa.

311 Consistent with the results of our morphological reconstructions that show Som<sup>+</sup> neurons  
312 as more compact than PKC $\delta$ <sup>+</sup> CeLC neurons, our electrophysiological measurements revealed  
313 that whole-cell capacitance is significantly lower in Som<sup>+</sup> than in PKC $\delta$ <sup>+</sup> CeLC late-firing neurons  
314 (**Figure 7G**). Notably, the number of evoked spikes significantly correlated with whole-cell  
315 capacitance in both late-firing and regular-spiking cells, with greater number of spikes seen in  
316 neurons with lower whole-cell capacitance (**Figure 7H and J**). These results demonstrate that  
317 more compact CeLC neurons are more excitable than larger cells, establishing a direct link  
318 between the distinct morphological properties of PKC $\delta$ <sup>+</sup> and Som<sup>+</sup> CeLC neurons and their  
319 excitability output.

### 320 **Nerve injury occludes differences in excitability between PKC $\delta$ <sup>+</sup> and Som<sup>+</sup> cells**

321 The results of the experiments presented in **Figure 2**, performed in the absence of injury, show  
322 that Som<sup>+</sup> cells in the CeLC are hyperexcitable compared to PKC $\delta$ <sup>+</sup> neurons in this brain region.  
323 In a mouse model of neuropathic pain, however, previous studies have shown that nerve injury  
324 induces increases in the excitability of PKC $\delta$ <sup>+</sup> neurons but that, in complete contrast, it decreases  
325 the excitability of Som<sup>+</sup> CeLC cells (Wilson et al., 2019). These results suggest that nerve injury  
326 affects the excitability differences normally seen in PKC $\delta$ <sup>+</sup> and Som<sup>+</sup> neurons, ultimately affecting  
327 the overall output gain in the CeA. Whether and how cell-type-specific changes in excitability  
328 following nerve injury affect the relative output of PKC $\delta$ <sup>+</sup> and Som<sup>+</sup> neurons in the CeLC remains  
329 unknown.

330 To investigate this, we used the mouse cuff model of neuropathic pain in combination with  
331 whole-cell patch-clamp in acute brain slices (**Figure 8A**). Consistent with previous reports using  
332 this neuropathic pain model (Benbouzid et al., 2008, Wilson et al., 2019), cuff implantation in the  
333 sciatic nerve elicited robust and significant hypersensitivity to cold, heat and tactile stimulation in  
334 the hindpaw ipsilateral to treatment compared to the paw contralateral to cuff placement (**Figure**

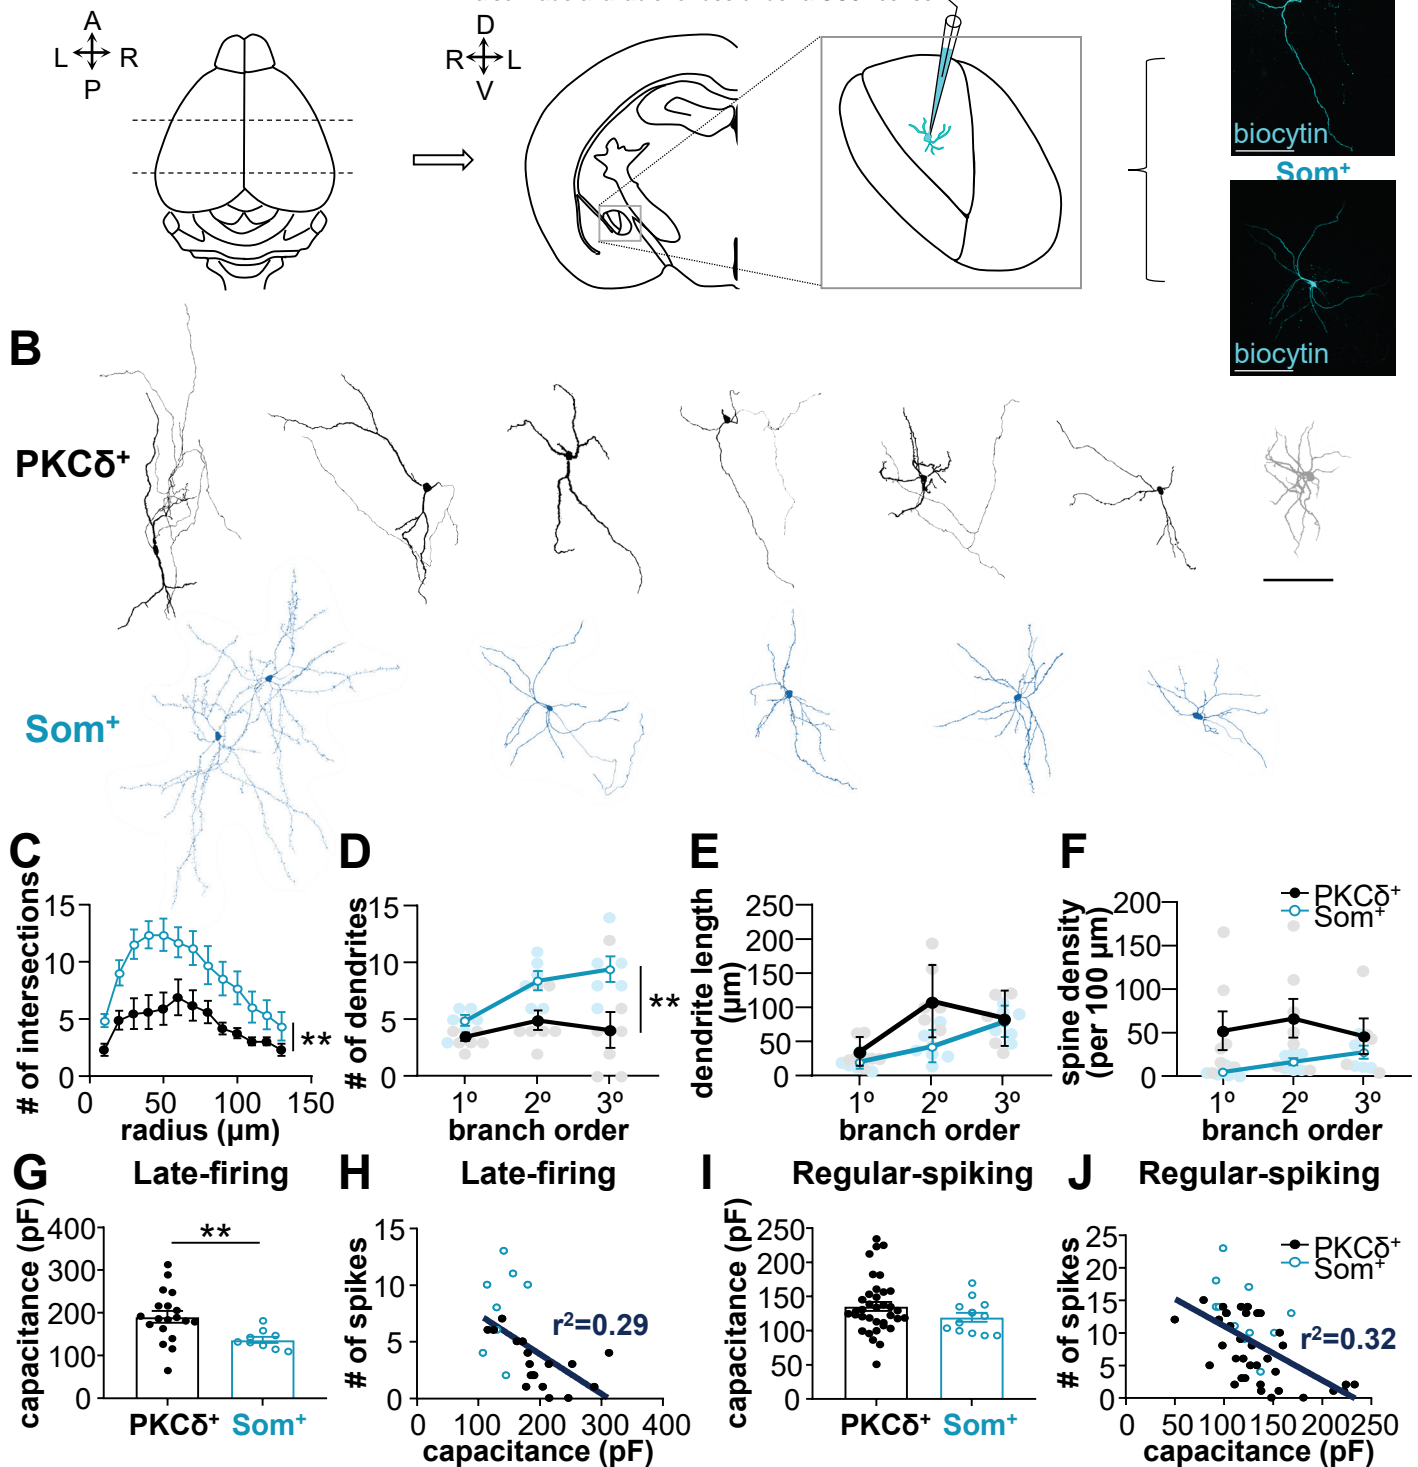

**Figure 7. PKC $\delta^+$  and Som $^+$  cells are morphologically distinct.** (A) Morphological reconstruction of biocytin-filled cells in acute brain slices. CeLC cells were filled with biocytin during whole-cell patch-clamp recordings in acute amygdala slices. Representative images of biocytin-filled PKC $\delta^+$  and Som $^+$  cells are shown in cyan in the right panel. Scale bars = 100  $\mu$ m. (B) Morphological reconstruction of PKC $\delta^+$  (top) and Som $^+$  biocytin-filled neurons. Scale bar = 100  $\mu$ m. (C) Sholl analysis for number of dendritic intersections as a function of radial distance from soma. (D-F) Numbers (D), lengths (E), and spine densities (F) of primary (1 $^\circ$ ), secondary (2 $^\circ$ ), and tertiary (3 $^\circ$ ) dendrites for PKC $\delta^+$  and Som $^+$  CeA cells. \*\* $p < 0.01$ , two-way ANOVA. (G and I) Whole-cell membrane capacitance for late-firing (G) and regular-spiking (I) PKC $\delta^+$  and Som $^+$  CeA cells. (H and J) Correlational plots between the number of action potentials evoked in response to prolonged (500 ms) depolarizing current injections of either 140 (regular-spiking) or 240 pA (late-firing) and whole-cell membrane capacitance in late-firing (H) and regular-spiking (J) PKC $\delta^+$  (black) and Som $^+$  (blue) CeA cells. A negative correlation was found in both late-firing ( $p = 0.0039$ ,  $r^2 = 0.29$ , linear regression analysis) and regular-spiking ( $p < 0.0001$ ,  $r^2 = 0.32$ , linear regression analysis) neurons. For PKC $\delta^+$  cells:  $n = 7$  cells for morphology;  $n = 18-19$  late-firing and  $n = 35-36$  for regular-spiking. For Som $^+$  cells:  $n = 6$  cells for morphology;  $n = 9$  late-firing and  $n = 13$  for regular-spiking. All values are expressed as mean  $\pm$  S.E.M.

335 **8A)**. Cold, heat and tactile hypersensitivity were assessed using the acetone, Hargreaves and  
336 von-Frey tests, respectively.

337 As illustrated in **Figure 8B**, and similar to what is seen in uninjured conditions (**Figure 2**),  
338 prolonged (500 ms) depolarizing current injections elicited repetitive firing in all four CeLC cell  
339 types following injury, with the number of evoked spikes increasing as a function of current  
340 injection amplitude. Notably, however, the number of spikes in response to prolonged depolarizing  
341 current injections is indistinguishable in PKC $\delta^+$  and Som $^+$  neurons following injury, in both late-  
342 firing and regular-spiking cells. This is in marked contrast to the pronounced differences seen in  
343 uninjured animals (**Figure 2**) and demonstrates that nerve injury occludes differences in  
344 excitability between PKC $\delta^+$  and Som $^+$  cells in the CeLC. Importantly, the differences in evoked  
345 firing responses between PKC $\delta^+$  and Som $^+$  late-firing neurons is dependent on the amplitude of  
346 the depolarizing current injected (**Figure 8C**). Thus, while the number of spikes elicited by high  
347 amplitude (360 pA) current injection is indistinguishable in PKC $\delta^+$  and Som $^+$  late-firing neurons,  
348 firing responses to low amplitude (180) current injections were significantly lower in Som $^+$  than in  
349 PKC $\delta^+$  neurons in the CeLC. Firing responses of regular-spiking neurons, in contrast, were  
350 indistinguishable independently of the amplitude of current injected, supporting further that the  
351 mechanisms driving excitability of late-firing and regular-spiking neurons are distinct.

352 Consistent with the nerve injury-induced masking of neuronal excitability differences in  
353 PKC $\delta^+$  and Som $^+$  CeLC neurons, the differences in resting membrane potential, input resistance,  
354 and latency to fire that we observed between PKC $\delta^+$  and Som $^+$  CeLC late-firing neurons in  
355 uninjured conditions (**Figure 2B-E**) were also occluded in PKC $\delta^+$  and Som $^+$  cells following nerve  
356 injury (**Figure 8 – figure supplement 1**).

357 Together, these results demonstrate that following nerve injury, the relative excitability of  
358 PKC $\delta^+$  and Som $^+$  cells is disrupted, thus affecting the contribution of these cells to overall output  
359 in the CeLC.





## 360 **DISCUSSION**

361 The CeLC has been recently hailed as a critical hub for modulating an array of behaviors, ranging  
362 from food-seeking to pain responses (Janak and Tye, 2015, Kim et al., 2017, Neugebauer et al.,  
363 2004). The two predominantly expressed cell types in the CeLC, PKC $\delta^+$  and Som $^+$  cells, have  
364 been shown to modulate many of these behaviors, often in opposing ways (Wilson et al., 2019,  
365 Li et al., 2013, Ciocchi et al., 2010, Haubensak et al., 2010). In the present study, we show that  
366 PKC $\delta^+$  and Som $^+$  CeLC neurons have different electrophysiological and morphological properties,  
367 supporting their distinct and diverse range of function. The results from our experiments  
368 demonstrate that while the firing phenotypes of these two genetically distinct CeLC cell types are  
369 heterogenous, there is a marked difference between the excitability of these cells, with Som $^+$   
370 neurons displaying a much greater output than PKC $\delta^+$  neurons.

371 In addition to the marked differences in excitability, our biocytin-based morphological  
372 reconstructions demonstrate that PKC $\delta^+$  and Som $^+$  CeLC neurons are morphologically distinct,  
373 with more complex dendritic arborization patterns seen in Som $^+$  than in PKC $\delta^+$  neurons.  
374 Importantly, our last set of experiments demonstrates that differences in the excitability of PKC $\delta^+$   
375 and Som $^+$  neurons are occluded in a mouse model of neuropathic pain, suggesting that  
376 maladaptive plastic changes that alter the relative output of CeLC cell types underlies the  
377 differential modulation of CeA-dependent behavior by these cells.

378 Together, the findings presented here identify fundamentally important differences in  
379 PKC $\delta^+$  and Som $^+$  neurons that support the functional heterogeneity in the CeLC, shedding insight  
380 into how distinct subpopulations of neurons within this small brain structure can differentially  
381 contribute to the modulation of multiple behavioral outputs.

### 382 **Greater output is a common feature of all Som $^+$ CeLC neurons**

383 Previous studies have demonstrated that PKC $\delta^+$  and Som $^+$  CeLC neurons have distinct, and often  
384 opposite, functions in the modulation of behaviors (Kim et al., 2017, Wilson et al., 2019, Janak  
385 and Tye, 2015). The cellular features that distinguish these two functionally distinct populations

386 of CeLC neurons, however, are unknown. The results presented here demonstrate that PKC $\delta^+$   
387 and Som $^+$  neurons are electrophysiologically distinct. Despite the heterogeneity in firing  
388 responses in both cell types (**Figure 1**), a common and robust feature of all Som $^+$  CeLC neurons  
389 is that they exhibit greater firing responses than PKC $\delta^+$  neurons within the same firing type  
390 (**Figure 2**). This is important because it suggests that the firing responses to input, as well as the  
391 overall output of these cells are distinct, demonstrating that information processing is different in  
392 PKC $\delta^+$  and Som $^+$  cells at baseline. Differences in how these cells respond to input might,  
393 therefore, contribute to their selective or differential influence on behavioral outputs.

394 Identifying the source of cell-type-specific differential excitability in the CeLC is a crucial  
395 step towards understanding their opposite function. The results from the experiments presented  
396 here suggest that there are at least two distinct sources for the cell-type-specific differential  
397 excitability of PKC $\delta^+$  and Som $^+$  CeLC cells. Differences in both passive and active intrinsic  
398 membrane properties, for example, seem to drive the relative hyperexcitability in Som $^+$  late-firing  
399 neurons but do not contribute to the differences in excitability in regular-spiking cells (**Figures 2-**  
400 **4**). The greater input resistance, slower repolarization, shorter latencies and lower current  
401 thresholds for action potential generation, as well as the lack of ISI accommodation in late-firing  
402 Som $^+$  neurons (compared to PKC $\delta^+$ ) are consistent with differences in potassium conductances  
403 between these cells.

404 Our results demonstrate that regular-spiking Som $^+$  neurons are also much more excitable  
405 than PKC $\delta^+$  regular-spiking CeLC cells but, unlike the late-firing neurons, most of the passive and  
406 active membrane properties are indistinguishable in these cells (**Figures 2-4**). Since synaptic  
407 blockers were not used in our experiments, these results suggest that the higher output in regular-  
408 spiking Som $^+$  neurons could be synaptically driven, which could result from higher excitatory  
409 inputs, lower inhibitory inputs, or a combination of both. The lateral and basolateral amygdala, as  
410 well as the lateral parabrachial nucleus are sources of excitatory inputs to the CeLC (Bernard and

411 Besson, 1990, Lopez de Armentia and Sah, 2004). Previous work has demonstrated that both  
412 Som<sup>+</sup> and Som<sup>-</sup> CeLC cells receive monosynaptic excitatory inputs from these brain regions  
413 (Wilson et al., 2019, Li et al., 2013, Li and Sheets, 2019). In all these studies, however,  
414 glutamatergic inputs to Som<sup>-</sup> cells are stronger than those to Som<sup>+</sup> neurons in the CeC (Li and  
415 Sheets, 2019, Li et al., 2013). Since PKC $\delta$ <sup>+</sup> and Som<sup>+</sup> neurons comprise most of the CeLC and  
416 are mutually exclusive (Kim et al., 2017, Li et al., 2013, Wilson et al., 2019), it is likely that most  
417 of the Som<sup>-</sup> neurons that receive stronger monosynaptic excitatory inputs are PKC $\delta$ <sup>+</sup> cells. These  
418 results are somewhat counterintuitive because PKC $\delta$ <sup>+</sup> cells show lower excitability than Som<sup>+</sup>  
419 CeLC neurons, suggesting that differences in excitatory inputs do not contribute to higher  
420 excitability in Som<sup>+</sup> CeLC neurons. Previous reports show, however, that PKC $\delta$ <sup>+</sup> and Som<sup>+</sup> CeLC  
421 neurons are interconnected and inhibit each other (Hunt et al., 2017, Haubensak et al., 2010),  
422 raising the possibility that differences in inhibitory inputs at the microcircuit level might contribute  
423 to the higher output of Som<sup>+</sup> CeLC neurons. An important variable to consider when trying to  
424 integrate the results of the present study with the results of the synaptic studies mentioned above  
425 is that the experiments described here were conducted in the dark phase of the cycle whereas  
426 the synaptic experiments referenced above were performed in the light phase of the cycle. This  
427 is particularly important given recent work demonstrating that the sleep-wake state of an animal  
428 influences the activity of CeLC neurons (Ma et al., 2019). Defining the intrinsic and synaptic  
429 mechanisms underlying the differences in excitability between genetically distinct cells in the  
430 CeLC will be essential to fully understand their differential function in the modulation of behaviors.

### 431 **Cell-type-specific morphology as a predictor of function**

432 CeLC neurons have been morphologically defined as medium spiny neurons with heterogenous  
433 dendritic branching complexities (Martina et al., 1999, Schiess et al., 1999, Chieng et al., 2006).  
434 Our biocytin-based morphological reconstruction of PKC $\delta$ <sup>+</sup> and Som<sup>+</sup> CeLC neurons revealed  
435 distinct morphological features in these cells (**Figure 7**). These results are surprising given the

436 heterogenous firing phenotypes of these genetically distinct populations of cells (**Figure 1**) but, at  
437 the same time, are consistent with previous studies that have failed to correlate morphological  
438 properties of CeLC neurons with firing phenotypes (Amano et al., 2012, Chieng et al., 2006,  
439 Schiess et al., 1999).

440 The two common distinguishing features we found between Som<sup>+</sup> and PKC $\delta$ <sup>+</sup> CeLC  
441 neurons are their morphology and relative excitability. Thus, Som<sup>+</sup> neurons are more compact,  
442 with lower whole-cell capacitance, a more complex dendritic branching pattern and a much  
443 greater overall firing output. PKC $\delta$ <sup>+</sup> neurons, in contrast, have fewer (but longer) dendrites, higher  
444 whole-cell capacitance and a much lower overall firing output than Som<sup>+</sup> neurons (**Figures 2 and**  
445 **7 and supplementary files 1 and 2**).

446 Previous studies have shown similar correlations between morphology and excitability in  
447 striatal medium spiny and cortical pyramidal neurons (Gertler et al., 2008, van der Velden et al.,  
448 2012). Thus, neurons expressing the D2 dopamine receptor are compact, have lower whole-cell  
449 capacitance and are more excitable, (similar to our Som<sup>+</sup> neurons) than those expressing the D1  
450 receptor (Gertler et al., 2008). Similar to our findings in Som<sup>+</sup> CeLC neurons, in the apical dendrite  
451 of layer 2/3 pyramidal neurons, higher dendritic branching complexities have been reported to  
452 correlate with greater excitability (van der Velden et al., 2012). Moreover, in cortical pyramidal  
453 neurons, higher complexity of dendritic branching complexity was shown to increase excitability  
454 by reducing ISI accommodation, which is consistent with the lack of ISI accommodation we see  
455 in Som<sup>+</sup> neurons (**Figure 3**). Together, these results demonstrate that cell-type-specific  
456 morphology is an important determinant of neuronal excitability in PKC $\delta$ <sup>+</sup> and Som<sup>+</sup> CeLC  
457 neurons and can be used as a predictor of function in the CeA.

458 **Pain-related changes in excitability exemplify the ability of PKC $\delta$ <sup>+</sup> and Som<sup>+</sup> CeLC to**  
459 **undergo robust plasticity**

460 Our cell-type-specific characterization of PKC $\delta^+$  and Som $^+$  cells in the CeLC demonstrated that  
461 the overall output of these two genetically distinct populations is different at baseline (**Figure 2**).  
462 In the context of pain, however, we found that these differences were occluded (**Figure 8**),  
463 highlighting the power of these cells to undergo plasticity. Our findings suggest that a disruption  
464 in the excitability equilibrium of PKC $\delta^+$  and Som $^+$  neurons can lead to CeLC-mediated pathological  
465 states. Whether the relative excitability of these cells is differentially affected in different  
466 behavioral contexts (i.e. food seeking behaviors, fear, drug reward and relapse, etc.) remains  
467 unknown.

468 Together, the findings described here demonstrate that genetically distinct CeLC neurons  
469 display cell-type-specific differences in firing output and dendritic morphology. These results  
470 support the distinct, and often opposite, contribution of PKC $\delta^+$  and Som $^+$  CeLC neurons in the  
471 modulation of specific behavioral outputs and set the foundation for future studies aimed  
472 at identifying the cellular mechanisms driving heterogeneity of function in the CeA.

## 473 **MATERIALS AND METHODS**

### 474 **Subjects**

475 All animal procedures were performed in accordance with the guidelines of the National Institutes  
476 of Health (NIH) and were approved by the Animal Care and Use Committee of the National  
477 Institute of Neurological Disorders and Stroke and the National Institute on Deafness and other  
478 Communication Disorders. Adult (9- to 17-weeks-old) male mice were used for all experiments.  
479 *Prkcd*-cre heterozygote male or female mice (GENSAT-founder line 011559-UCD) were crossed  
480 with homozygous Ai9 mice (Jackson Laboratories). *Sst*-cre heterozygote males (Jackson  
481 Laboratory – founder line 018973) were crossed with homozygous female Ai9 (Jackson  
482 Laboratory) mice. Offspring mice were genotyped for the presence of cre-recombinase using DNA  
483 extracted from tail biopsies and PCR (Transnetyx) with the following primers:

484 TTAATCCATATTGGCAGAACGAAAACG (forward) and CAGGCTAAGTGCCTTCTCTACA  
485 (reverse). Mice were housed in single cages or in pairs with littermates, separated by a perforated  
486 Plexiglass divider and kept in a reversed 12-hour light/dark cycle, with lights on from 9 pm to 9  
487 am. Food and water were provided *ad libitum*. Prior to all experiments, mice were handled as  
488 previously described for at least 5 days to minimize potential stress effects associated with  
489 handling (Hurst and West, 2010). While handling, mice were also administered a 0.1 mL saline  
490 interperitoneally by the same experimenter that would be anesthetizing it for perfusion and acute  
491 slice preparation.

#### 492 ***Ex-vivo* electrophysiology**

493 *Acute slice preparation* - Mice were deeply anesthetized using 1.25% Avertin (0.4 mg/g body  
494 weight) injected intraperitoneally and then transcardially perfused with ice-cold cutting solution  
495 composed of (in mM) 110 choline chloride, 25 NaHCO<sub>3</sub>, 1.25 NaH<sub>2</sub>PO<sub>4</sub>, 2.5 KCl, 0.5 CaCl<sub>2</sub>, 7.2  
496 MgCl<sub>2</sub>, 25 D-glucose, 12.7 L-ascorbic acid, and 3.1 pyruvic acid, oxygenated with 95%/5%  
497 O<sub>2</sub>/CO<sub>2</sub>. The brains were rapidly extracted, placed in ice-cold cutting solution, and cut in coronal  
498 slices (250 - 300 μm) using a Leica VT1200 S vibrating blade microtome (Leica Microsystems  
499 Inc., Buffalo Grove, IL, USA). Slices containing the CeA were incubated at 33°C for 30 minutes in  
500 a holding chamber containing artificial cerebral spinal fluid (ACSF) composed of (in mM) 125  
501 NaCl, 2.5 KCl, 1.25 NaH<sub>2</sub>PO<sub>4</sub>, 25 NaHCO<sub>3</sub>, 2 CaCl<sub>2</sub>, 1 MgCl<sub>2</sub>, and 25 D-glucose. The chambers  
502 containing the slices were then moved to room temperature, and slices recovered for at least 20  
503 minutes prior to recording. During incubation and recovery, the chambers were continuously  
504 oxygenated with 95%/5% O<sub>2</sub>/CO<sub>2</sub>.

505 *Whole-cell patch-clamp recordings* - The recording chamber was perfused continuously with  
506 ACSF oxygenated with 95%/5% O<sub>2</sub>/CO<sub>2</sub> (1 mL/min) and all recordings were performed at 33±1°C.  
507 A recording chamber heater and an in-line solution heater (Warner Instruments) were used to  
508 control and monitor the bath temperature throughout the experiment. Recording pipettes (3-5 MΩ



509 resistance) were filled with internal solution composed of (in mM) 120 potassium methyl sulfate,  
510 20 KCl, 10 HEPES, 0.2 EGTA, 8 NaCl<sub>2</sub>, 4 Mg-ATP, 0.3 Tris-GTP, and 14 phosphocreatine with a  
511 pH of 7.3 using 5 M KOH and an osmolarity of ~300 mosmol<sup>-1</sup>. Biocytin (3 mg/mL) was added to  
512 the internal solution of some recordings and sonicated in ice-cold water for 20 minutes. Whole-  
513 cell current-clamp recordings were obtained from tdTomato-expressing CeLC neurons. Cells  
514 were visually identified using an upright microscope (Nikon Eclipse FN1) equipped with differential  
515 interference contrast optics with infrared illumination and epifluorescence. Recording electrodes  
516 were visually positioned in the CeLC, guided by the distinctive fiber bundles and anatomical  
517 landmarks delineating its structure (**Figure 1B**). Recordings were controlled using the Multiclamp  
518 700B patch-clamp amplifier interfaced with a Digidata 1500 acquisition system and pCLAMP 10.7  
519 software (Axon Instruments, Union City, CA) on a Dell computer. Before forming a membrane-  
520 pipette seal, pipette tip potentials were zeroed and pipette capacitances and series resistances  
521 (not exceeding 20 MΩ) were monitored throughout the recordings. Whole-cell capacitance was  
522 measured in voltage-clamp configuration, with the cell held at -70 mV then subjected to a 25 ms  
523 ±10 mV current change. Brief (5 ms) and prolonged (500 ms) depolarizing current of various  
524 amplitudes were injected, while the cells were at resting membrane potential, to elicit single and  
525 repetitive action potential firing, respectively.

526 *Data Analysis* – Electrophysiological data were analyzed using ClampFit 10.7 (Molecular  
527 Devices), Microsoft Excel, Mini Analysis (v. 6.0.7, Synaptosoft, Inc., Decatur, GA), and Prism (v.  
528 8, GraphPad Software Inc., La Jolla, CA). Data obtained from naïve animals and animals that  
529 received a sciatic nerve sham surgery were pooled and used to analyze baseline properties as  
530 no significant differences were seen between these conditions. Single action potential properties  
531 were measured from the action potentials generated in response to a 5 ms depolarizing current  
532 injection. Current threshold for action potential generation ( $I_{\text{threshold}}$ ) was defined as the minimum  
533 current injection required to elicit an action potential. Voltage threshold ( $V_{\text{threshold}}$ ) was calculated



534 from the third derivative of the variation in membrane potential as a function of time during the  
535 rise of the action potential using the Mini Analysis software. Differentiated traces were digitally  
536 Gaussian filtered and smoothed by 30-100 points. Action potential duration (APD) was measured  
537 at 100% repolarization to voltage threshold ( $V_{\text{threshold}}$ ). Rise time was defined as the time required  
538 for the membrane potential to reach peak voltage from  $V_{\text{threshold}}$  and decay was defined as the  
539 time required for the membrane potential to repolarize from 90% of its peak to  $V_{\text{threshold}}$ . Phase  
540 plots of single action potentials were generated by plotting the first derivative of the variation in  
541 membrane potential as a function of the membrane potential. Action potential  
542 afterhyperpolarization (AHP) was calculated from the phase plots of single action potentials and  
543 was defined as the voltage at which the first derivative of the variation in membrane potential  
544 during the repolarizing phase of the action potential reached zero or switched polarity. Input  
545 resistance ( $R_{\text{in}}$ ) was calculated using the average change in membrane potential in response to  
546 a  $\pm 20$  pA current injection of 500 ms duration. Rheobase was defined as the minimum current  
547 required to induce an action potential in response to a 500 ms depolarizing current injection.  
548 Latency to fire for PKC $\delta^+$  vs Som $^+$  cells comparisons was calculated at 2x rheobase and was  
549 defined as the time between current injection onset to action potential threshold. Voltage sag was  
550 calculated from the difference between the steady state and peak voltage responses to a 500 ms  
551 500 pA hyperpolarizing current injection. Accommodation of inter-spike interval (ISI), action  
552 potential amplitude, action potential duration (calculated at 50% repolarization relative to voltage  
553 threshold) and afterhyperpolarization amplitude were calculated from the ratio of the  
554 measurements obtained from the last and first action potential in response to a 500 ms  
555 depolarizing current injection at 2x rheobase. ISI accommodating cells were defined as cells with  
556 a ratio greater than or equal to 1.5 whereas ISI non-accommodating cells had a ratio of less than  
557 1.5. Latency to first spike was used to classify cells as late-firing or regular-spiking neurons. Cells  
558 with latencies shorter than 100 ms (at baseline) or 90 ms (pain conditions) were classified as  
559 regular-spiking. Conversely, cells with latencies higher than 100 ms (at baseline) or 90 ms (pain

560 conditions) were classified as late-firing. Current amplitudes that elicited an average of 10 spikes  
561 (range of 5-19 spikes) were used to calculate latencies to first spike and, subsequently, to classify  
562 cells as late-firing or regular-spiking. In baseline (no pain) conditions, this current amplitude was  
563 220 pA for Som<sup>+</sup> cells and 280 pA for PKC $\delta$ <sup>+</sup> neurons. Current amplitudes of 220 pA were used  
564 for both Som<sup>+</sup> and PKC $\delta$ <sup>+</sup> neurons in pain conditions. Number of spikes in response to a 500 ms  
565 depolarizing current injection of 140 pA (regular-spiking cells) or 240 pA (late-firing cells)  
566 amplitude was used to evaluate subnuclei and rostro-caudal differences in firing responses as  
567 well as firing responses as a function of whole-cell capacitance. Whole-cell membrane  
568 capacitance was calculated by integrating the capacitive transients elicited by a 25 ms voltage  
569 step ( $\pm 10$  mV) from -70 mV. Recording sites were constructed using the Mouse Brain Atlas as a  
570 guide (Paxinos et al., 2001).

#### 571 **Morphological reconstruction of biocytin-filled cells**

572 *Preservation and staining of biocytin-filled neurons* - Following current-clamp recordings, we  
573 followed procedures previously described to remove the recording electrode from the cell and  
574 retain the morphology of the cell (Swietek et al., 2016). In brief, the recording pipette was moved  
575 in slow alternating steps upward and outward in voltage-clamp mode while continuously  
576 monitoring the capacitive transients in order to reestablish a seal. Following re-sealing, the slice  
577 was left in the recording chamber for approximately three minutes to ensure transport of biocytin  
578 to distal processes. The slice was then removed from the recording chamber and immediately  
579 placed into 4% paraformaldehyde solution in 0.1 M Phosphate Buffer (PFA/PB), pH 7.4, at 4°C  
580 for 48 hours, followed by 0.1 M Phosphate Buffered Saline (PBS) (pH 7.4) with 0.01% sodium  
581 azide at 4°C until staining. Slices were rinsed with 0.1 M PBS 3 times for 5 minutes at room  
582 temperature while shaking at a low speed, then incubated in PBS containing 0.1% Triton-X-100  
583 for 10 minutes. Samples were then incubated overnight, at 4°C and protected from light, in 1:500  
584 Alexa Fluor 647 Streptavidin (Jackson 016-600-084) in blocking solution containing 1.5% normal

585 goat serum (NGS) (Vector Labs, Burlingame, CA), 0.1% Triton-X-100, 0.05% Tween-20, and 1%  
586 bovine serum albumin (BSA). In minimal light, slices were then washed in 0.1 M PBS 4 times for  
587 30 minutes at room temperature. Slices were then cleared using increasing concentrations of 2,2'-  
588 thiodiethanol (TDE) for 10 minutes each using 10, 30, 60, and 80% concentrations (Costantini et  
589 al., 2015), followed by incubation in 97% TDE for two hours. Slices were then mounted on  
590 positively-charged glass slides and covered with glass coverslips using 97% TDE.

591 *Image acquisition, morphological reconstruction and analysis* - Images of recovered biocytin-filled  
592 neurons were taken using a Nikon A1R laser scanning confocal microscope with a 40x oil-  
593 immersion objective. Gain and pinhole size were kept constant between experiments. Sequential  
594 acquisition of z-stacks was collected at 0.09  $\mu\text{m}$  steps. Images were collected at varying sizes,  
595 depending on the extension of the dendrites of each neuron, and were then automatically stitched  
596 upon acquisition using NIS Elements software. To quantify neuronal morphology, z-stacks were  
597 analyzed using NeuroLucida 360 (NeuroLucida 360, MBF Bioscience, Williston, VT). Cell bodies  
598 were identified using automatic detection of a user-defined area and dendritic branches were  
599 traced using the user-guided tree-tracing function. To identify spines, automatic spine detection  
600 was performed using image noise filtering. The experimenter manually confirmed or rejected all  
601 parameters analyzed. Primary dendrites were defined as the dendrites directly extending from the  
602 soma. Secondary dendrites branched from primary dendrites, and tertiary dendrites were the  
603 branching points of secondary dendrites. Dendritic length was defined as the distance from the  
604 trunk of the branch to either the distal branching point, or the visible end of the projection. Spine  
605 density was calculated by counting the individual spines present on the dendrites and reported  
606 per 100  $\mu\text{m}$  of dendrite. Dendritic properties were obtained using branched-structure and Sholl  
607 analysis functions from NeuroLucida Explorer. The number of dendritic intersections at increasing  
608 radial distances from the soma, in 10  $\mu\text{m}$  increments, were quantified and used for the Sholl  
609 analysis.

## 610 **Immunohistochemistry**

611 Sst-cre::Ai9 mice were deeply anesthetized with 1.25% Avertin (2,2,2-tribromoethanol and tert-  
612 amyl alcohol in 0.9% NaCl; 0.025 ml/g body weight) and were then perfused transcardially with  
613 37°C 0.9% NaCl, followed by 100 mL of ice-cold 4% PFA/PB. The brains were carefully dissected  
614 and post-fixed overnight in 4% PFA/PB at 4°C. After cryoprotection in 30% sucrose/PB for 48 h,  
615 the brains were sliced in 30 µm coronal sections using a freezing sliding microtome. The sections  
616 were stored in 0.1 M Phosphate Buffered Saline (PBS), pH 7.4 containing 0.01% sodium azide  
617 (Sigma) at 4°C until immunostaining. To begin staining, sections were rinsed in PBS, then  
618 incubated in PBS containing 0.1% Triton X100 for 10 minutes at room temperature, followed by  
619 blocking at room temperature for 30 minutes in blocking solution containing 5% normal goat  
620 serum (NGS) (Vector Labs, Burlingame, CA), 0.1% Triton X100, 0.05% Tween-20 and 1% bovine  
621 serum albumin (BSA). Sections were then incubated for 72 h at 4°C in mouse anti-PKCδ primary  
622 antibody (1:1000, BD Biosciences, 610397) in blocking solution containing 1.5% NGS, 0.1%  
623 Triton X100, 0.05% Tween-20 and 1% BSA. Following the primary antibody incubation, sections  
624 were rinsed in PBS and incubated in Alexa Fluor 647-conjugated goat anti-mouse (1:100,  
625 Invitrogen, A21235) secondary antibody in blocking solution containing 1.5% NGS, 0.1% Triton  
626 X100, 0.05% Tween 20 and 1% BSA for 2 hours at room temperature and protected from light.  
627 Sections were rinsed in PBS, mounted on positively charged glass slides, and left overnight to  
628 air-dry before coverslips were set using Fluoromount-G (SouthernBiotech). Representative high  
629 magnification images were collected using a Nikon A1R laser scanning confocal microscope and  
630 a 40x oil-immersion objective. Laser intensity, gain, and pinhole were kept constant between  
631 images. Sequential acquisition of multiple channels was used, and z-stacks were collected at 0.9  
632 µm steps. Images were collected at a size of 0.7 x 0.59 mm and were automatically stitched upon  
633 acquisition using NIS Elements software. Image stacks were converted into maximum intensity

634 z-projections using the NIS Elements software. Anatomical limits of each region were identified  
635 using a mouse brain atlas (Paxinos and Franklin, 2008).

### 636 **Sciatic nerve surgeries and nociceptive testing**

637 *Sciatic cuff implantation* - Sciatic nerve cuff and sham surgeries were performed as previously  
638 described (Benbouzid et al., 2008). In brief, mice were anesthetized using 2% isoflurane (0.5  
639 L/min). A 1-cm long incision was made along the proximal third of the lateral left thigh and the  
640 sciatic nerve was exteriorized and gently stretched using forceps. The nerve was either returned  
641 to its normal position (sham animals) or a 2 mm piece of PE-20 non-toxic, sterile polyethylene  
642 tubing (0.38 mm ID/1.09 mm OD) was split along and slid onto the sciatic nerve (cuff animals).  
643 After returning the nerve to its normal position, wound clips were used to close the skin. All  
644 electrophysiological and behavioral experiments were performed 6-14 days following surgeries.

645 *Nociceptive testing* - Mice were habituated to the 11 × 11 × 13 cm ventilated Plexiglas testing  
646 chambers placed on an elevated mesh platform (for von Frey and acetone tests) or a clear glass  
647 surface heated to 30°C (for Hargreaves test) for 1-3 h prior to testing. von Frey filaments (North  
648 Coast Medical, Inc. San Jose, CA) were used to assess mechanical sensitivity as previously  
649 described (Carrasquillo and Gereau IV, 2007). Beginning with the smallest fiber, the experimenter  
650 applied filaments to the hind-paw until the filament bent ~ 30° for ~2 s. The smallest filament to  
651 evoke a paw withdrawal response in at least three of five trials was recorded as the paw  
652 withdrawal threshold. Thermal sensitivity to heat was assessed using a modified version of the  
653 Hargreaves test (Hargreaves et al., 1988) as described previously (Carrasquillo and Gereau IV,  
654 2007). A thermal stimulus with an active intensity of 35 was delivered from a constant radiant heat  
655 source through the glass bottom of the chamber to the plantar surface of the hind-paw (IITC Life  
656 Sciences, Woodland Hills, CA) and the latency to elicit paw withdrawal was recorded. To measure  
657 sensitivity to cold, we adapted the acetone evaporative test (Choi et al., 1994). Acetone (Sigma)  
658 was drawn into a 1 mL syringe and a drop was lightly applied to the hind-paw through the wire

659 mesh. The drop of acetone (and not the syringe tip) was placed against the plantar surface of the  
660 hind-paw. Nociceptive responses and pain-like behaviors were quantified for 60 s following  
661 acetone exposure. Response quantification was modeled after a previously reported scoring  
662 system (Colburn et al., 2007). Transient lifting, licking, or shaking of the hind-paw that subsided  
663 immediately was given a score of 0; the same behaviors continuing up to but not past 5 s after  
664 initial application was given a score of 1; repeated and prolonged lifting, licking, or shaking of the  
665 hind-paw was given a score of 2. Three to five measurements were taken for each hind-paw on  
666 each behavioral assay and the average paw withdrawal thresholds (von Frey), paw withdrawal  
667 latencies (Hargreaves) and nociceptive scores (acetone) were calculated individually for each  
668 hindpaw. Hypersensitivity was assessed by comparing withdrawal thresholds in the paw  
669 ipsilateral to the side of sciatic nerve surgery compared to the paw contralateral to the side of  
670 sciatic nerve surgery.

## 671 **Statistics**

672 Results are expressed as mean  $\pm$  standard errors of the mean (SEM). Analysis was performed  
673 using either Student's unpaired t-tests (with or without Welch's correction for variance), Mann-  
674 Whitney U tests, Chi-squared (one-sided) tests, or two-way analyses of variance (ANOVA)  
675 followed by posthoc Tukey, Sidak's or Dunnett's multiple comparison tests. All analyses were  
676 performed using GraphPad Prism (v. 8) and *p* values lower than 0.05 were considered significant  
677 and are reported in figure legends. Detailed information for all statistical tests performed are  
678 reported in **Table 3**.

## 679 **Data availability**

680 All data in this study is available from the corresponding author.

## 681 **ACKNOWLEDGEMENTS**

**Table 3. Statistical Analyses**

| Figure                                  | Data Structure                                | Type of Test                                         | Sample Size                                                       | Statistical Data                                                                                                |
|-----------------------------------------|-----------------------------------------------|------------------------------------------------------|-------------------------------------------------------------------|-----------------------------------------------------------------------------------------------------------------|
| <b>Figure 1</b>                         |                                               |                                                      |                                                                   |                                                                                                                 |
| 1D (% cell types)                       | parts of a whole                              | Chi-square                                           | PKCδ <sup>+</sup> = 75 cells<br>Som <sup>+</sup> = 49 cells       | Chi-square = 10.42; df = 2; p = 0.0055                                                                          |
| <b>Figure 2</b>                         |                                               |                                                      |                                                                   |                                                                                                                 |
| 2A (IF curve LF)                        | two factors (cell type and current injection) | two-way ANOVA with RM                                | PKCδ <sup>+</sup> LF = 19 cells<br>Som <sup>+</sup> LF = 9 cells  | cell type: $F_{(1,25)} = 23.89$ ; $p < 0.0001$<br>current injection: $F_{(1,708,42.71)} = 238.4$ ; $p < 0.0001$ |
| 2A(IF curve RS)                         | two factors (genotype and current injection)  | two-way ANOVA with RM                                | PKCδ <sup>+</sup> RS = 36 cells<br>Som <sup>+</sup> RS = 12 cells | cell type: $F_{(1,46)} = 9.440$ ; $p = 0.0036$<br>current injection: $F_{(1,785,82.13)} = 185.7$ ; $p < 0.0001$ |
| 2B (latency LF)                         | normal distribution, same variance            | unpaired t-test (two-tailed)                         | PKCδ <sup>+</sup> LF = 16 cells<br>Som <sup>+</sup> LF = 9 cells  | $t = 3.206$ ; $df = 23$ ; $p = 0.0039$ ; eta squared = 0.309                                                    |
| 2C (rheobase LF)                        | normal distribution, same variance            | unpaired t-test (two-tailed)                         | PKCδ <sup>+</sup> LF = 18 cells<br>Som <sup>+</sup> LF = 9 cells  | $t = 2.012$ ; $df = 25$ ; $p = 0.0551$ ; eta squared = 0.139                                                    |
| 2D top ( $R_{in}$ LF)                   | non-normal distribution                       | Mann-Whitney U test                                  | PKCδ <sup>+</sup> LF = 18 cells<br>Som <sup>+</sup> LF = 9 cells  | $p = 0.0308$ (two-tailed); $U = 39$                                                                             |
| 2E top ( $V_{rest}$ LF)                 | normal distribution, different variances      | unpaired t-test with Welch's correction (two-tailed) | PKCδ <sup>+</sup> LF = 18 cells<br>Som <sup>+</sup> LF = 9 cells  | $t = 4.360$ ; $df = 24.99$ ; $p = 0.0002$ ; eta squared = 0.432                                                 |
| 2F (latency RS)                         | normal distribution, same variance            | unpaired t-test (two-tailed)                         | PKCδ <sup>+</sup> RS = 36 cells<br>Som <sup>+</sup> RS = 12 cells | $t = 1.720$ ; $df = 46$ ; $p = 0.0921$ ; eta squared = 0.060                                                    |
| 2G (rheobase RS)                        | non-normal distribution                       | Mann-Whitney U test                                  | PKCδ <sup>+</sup> RS = 36 cells<br>Som <sup>+</sup> RS = 12 cells | $p = 0.2807$ (two-tailed); $U = 171$                                                                            |
| 2H ( $R_{in}$ RS)                       | normal distribution, same variance            | unpaired t-test (two-tailed)                         | PKCδ <sup>+</sup> RS = 36 cells<br>Som <sup>+</sup> RS = 12 cells | $t = 0.5057$ ; $df = 46$ ; $p = 0.6155$ ; eta squared = 0.006                                                   |
| 2I ( $V_{rest}$ RS)                     | normal distribution, same variance            | unpaired t-test (two-tailed)                         | PKCδ <sup>+</sup> RS = 35 cells<br>Som <sup>+</sup> RS = 12 cells | $t = 0.6467$ ; $df = 45$ ; $p = 0.5211$ ; eta squared = 0.009                                                   |
| <b>Figure 3</b>                         |                                               |                                                      |                                                                   |                                                                                                                 |
| 3Ci (PKCδ <sup>+</sup> LF peak voltage) | normal distribution                           | paired t-test (two-tailed)                           | $n = 15$ cells                                                    | $t = 8$ ; $df = 14$ ; $p < 0.0001$ ; eta squared = 0.8444                                                       |
| 3Cii (Som <sup>+</sup> LF peak voltage) | normal distribution                           | paired t-test (two-tailed)                           | $n = 9$ cells                                                     | $t = 7.088$ ; $df = 8$ ; $p < 0.0001$ ; eta squared = 0.8626                                                    |
| 3Ciii (accommodation ratio LF)          | normal distribution, same variance            | unpaired t-test (two-tailed)                         | PKCδ <sup>+</sup> LF = 15 cells<br>Som <sup>+</sup> LF = 9 cells  | $t = 3.284$ ; $df = 22$ ; $p = 0.0034$ ; eta squared = 0.3289                                                   |
| 3Di (PKCδ <sup>+</sup> RS peak voltage) | normal distribution                           | paired t-test (two-tailed)                           | $n = 36$ cells                                                    | $t = 12.24$ ; $df = 35$ ; $p < 0.0001$ ; eta squared = 0.8107                                                   |
| 3Dii (Som <sup>+</sup> RS peak voltage) | normal distribution                           | paired t-test (two-tailed)                           | $n = 13$ cells                                                    | $t = 4.923$ ; $df = 12$ ; $p = 0.0004$ ; eta squared = 0.6688                                                   |
| 3Diii (accommodation ratio RS)          | non-normal distribution                       | Mann-Whitney U test                                  | PKCδ <sup>+</sup> RS = 35 cells<br>Som <sup>+</sup> RS = 12 cells | $p = 0.0687$ (two-tailed); $U = 135$                                                                            |
| 3Ei (PKCδ <sup>+</sup> LF width)        | normal distribution                           | paired t-test (two-tailed)                           | $n = 14$ cells                                                    | $t = 4.243$ ; $df = 13$ ; $p = 0.0010$ ; eta squared = 0.5807                                                   |
| 3Eii (Som <sup>+</sup> LF width)        | normal distribution                           | paired t-test (two-tailed)                           | $n = 9$ cells                                                     | $t = 5.307$ ; $df = 9$ ; $p = 0.0007$ ; eta squared = 0.7788                                                    |
| 3Eiii (width accommodation ratio LF)    | normal distribution, same variance            | unpaired t-test (two-tailed)                         | PKCδ <sup>+</sup> LF = 16 cells<br>Som <sup>+</sup> LF = 9 cells  | $t = 0.6847$ ; $df = 23$ ; $p = 0.5004$ ; eta squared = 0.020                                                   |
| 3Fi (PKCδ <sup>+</sup> RS width)        | normal distribution                           | paired t-test (two-tailed)                           | $n = 33$ cells                                                    | $t = 6.279$ ; $df = 32$ ; $p < 0.0001$ ; eta squared = 0.5520                                                   |
| 3Fii (Som <sup>+</sup> RS width)        | normal distribution                           | paired t-test (two-tailed)                           | $n = 13$ cells                                                    | $t = 6.196$ ; $df = 12$ ; $p < 0.0001$ ; eta squared = 0.7618                                                   |
| 3Fiii (width accommodation ratio RS)    | non-normal distribution                       | Mann-Whitney U test                                  | PKCδ <sup>+</sup> RS = 36 cells<br>Som <sup>+</sup> RS = 12 cells | $p = 0.0520$ (two-tailed); $U = 134.5$                                                                          |
| 3Gi (PKCδ <sup>+</sup> LF AHP)          | normal distribution                           | paired t-test (two-tailed)                           | $n = 16$ cells                                                    | $t = 10.30$ ; $df = 15$ ; $p < 0.0001$ ; eta squared = 0.8760                                                   |
| 3Gii (Som <sup>+</sup> LF AHP)          | normal distribution                           | paired t-test (two-tailed)                           | $n = 9$ cells                                                     | $t = 9.170$ ; $df = 8$ ; $p < 0.0001$ ; eta squared = 0.9131                                                    |
| 3Giii (AHP accommodation ratio LF)      | normal distribution, same variance            | unpaired t-test (two-tailed)                         | PKCδ <sup>+</sup> LF = 16 cells<br>Som <sup>+</sup> LF = 9 cells  | $t = 1.643$ ; $df = 23$ ; $p = 0.1140$ ; eta squared = 0.105                                                    |
| 3Hi (PKCδ <sup>+</sup> RS AHP)          | normal distribution                           | paired t-test (two-tailed)                           | $n = 36$ cells                                                    | $t = 11.03$ ; $df = 35$ ; $p < 0.0001$ ; eta squared = 0.7766                                                   |
| 3Hii (Som <sup>+</sup> RS AHP)          | normal distribution                           | paired t-test (two-tailed)                           | $n = 12$ cells                                                    | $t = 6.368$ ; $df = 11$ ; $p < 0.0001$ ; eta squared = 0.7866                                                   |
| 3Hiii (AHP accommodation ratio RS)      | normal distribution, different variances      | unpaired t-test with Welch's correction (two-tailed) | PKCδ <sup>+</sup> RS = 36 cells<br>Som <sup>+</sup> RS = 12 cells | $t = 2.821$ ; $df = 13.30$ ; $p = 0.0142$ ; eta squared = 0.375                                                 |



cont. Table 3. Statistical Analyses

| Figure                          | Data Structure                           | Type of Test                                         | Sample Size                                                                                                                                                                                                                                                                                                                       | Statistical Data                                                                                                                                                                                                                                              |
|---------------------------------|------------------------------------------|------------------------------------------------------|-----------------------------------------------------------------------------------------------------------------------------------------------------------------------------------------------------------------------------------------------------------------------------------------------------------------------------------|---------------------------------------------------------------------------------------------------------------------------------------------------------------------------------------------------------------------------------------------------------------|
| <b>Figure 4</b>                 |                                          |                                                      |                                                                                                                                                                                                                                                                                                                                   |                                                                                                                                                                                                                                                               |
| 4B ( $I_{\text{threshold}}$ LF) | normal distribution, different variances | unpaired t-test with Welch's correction (two-tailed) | PKC $\delta^+$ LF = 16 cells<br>Som $^+$ LF = 9 cells                                                                                                                                                                                                                                                                             | t = 5.323; df = 21.33; p < 0.0001; eta squared = 0.5706                                                                                                                                                                                                       |
| 4C ( $V_{\text{threshold}}$ LF) | non-normal distribution                  | Mann-Whitney U test                                  | PKC $\delta^+$ LF = 16 cells<br>Som $^+$ LF = 9 cells                                                                                                                                                                                                                                                                             | p = 0.1687 (two-tailed); U = 47                                                                                                                                                                                                                               |
| 4D (rise LF)                    | normal distribution, same variance       | unpaired t-test (two-tailed)                         | PKC $\delta^+$ LF = 16 cells<br>Som $^+$ LF = 9 cells                                                                                                                                                                                                                                                                             | t = 0.7270; df = 23; p = 0.4746; eta squared = 0.022                                                                                                                                                                                                          |
| 4E (decay LF)                   | non-normal distribution                  | Mann-Whitney U test                                  | PKC $\delta^+$ LF = 16 cells<br>Som $^+$ LF = 9 cells                                                                                                                                                                                                                                                                             | p < 0.0001 (two-tailed); U = 9                                                                                                                                                                                                                                |
| 4F (width LF)                   | non-normal distribution                  | Mann-Whitney U test                                  | PKC $\delta^+$ LF = 16 cells<br>Som $^+$ LF = 9 cells                                                                                                                                                                                                                                                                             | p < 0.0001 (two-tailed); U = 0                                                                                                                                                                                                                                |
| 4G (AHP LF)                     | normal distribution, same variance       | unpaired t-test (two-tailed)                         | PKC $\delta^+$ LF = 16 cells<br>Som $^+$ LF = 9 cells                                                                                                                                                                                                                                                                             | t = 2.071; df = 23; p = 0.0498; eta squared = 0.1572                                                                                                                                                                                                          |
| 4H ( $I_{\text{threshold}}$ RS) | non-normal distribution                  | Mann-Whitney U test                                  | PKC $\delta^+$ RS = 31 cells<br>Som $^+$ RS = 10 cells                                                                                                                                                                                                                                                                            | p = 0.1067 (two-tailed); U = 101.5                                                                                                                                                                                                                            |
| 4I ( $V_{\text{threshold}}$ RS) | normal distribution, same variance       | unpaired t-test (two-tailed)                         | PKC $\delta^+$ RS = 31 cells<br>Som $^+$ RS = 10 cells                                                                                                                                                                                                                                                                            | t = 0.5674; df = 39; p = 0.5737; eta squared = 0.008                                                                                                                                                                                                          |
| 4J (rise RS)                    | normal distribution, same variance       | unpaired t-test (two-tailed)                         | PKC $\delta^+$ RS = 31 cells<br>Som $^+$ RS = 10 cells                                                                                                                                                                                                                                                                            | t = 1.068; df = 39; p = 0.2919; eta squared = 0.028                                                                                                                                                                                                           |
| 4K (decay RS)                   | non-normal distribution                  | Mann-Whitney U test                                  | PKC $\delta^+$ RS = 31 cells<br>Som $^+$ RS = 10 cells                                                                                                                                                                                                                                                                            | p = 0.1720 (two-tailed); U = 109.5                                                                                                                                                                                                                            |
| 4L (width RS)                   | normal distribution, same variance       | unpaired t-test (two-tailed)                         | PKC $\delta^+$ RS = 31 cells<br>Som $^+$ RS = 10 cells                                                                                                                                                                                                                                                                            | t = 1.740; df = 39; p = 0.0898; eta squared = 0.072                                                                                                                                                                                                           |
| 4M (AHP RS)                     | normal distribution, same variance       | unpaired t-test (two-tailed)                         | PKC $\delta^+$ RS = 31 cells<br>Som $^+$ RS = 10 cells                                                                                                                                                                                                                                                                            | t = 3.631; df = 39; p = 0.0008; eta squared = 0.2527                                                                                                                                                                                                          |
| <b>Figure 6</b>                 |                                          |                                                      |                                                                                                                                                                                                                                                                                                                                   |                                                                                                                                                                                                                                                               |
| 6Ci (# of APs RS)               | no assumptions made about normality      | linear regression                                    | CeC:<br>bregma -1.06 = 5 cells<br>bregma -1.34 = 1 cell<br>bregma -1.46 = 2 cells<br>bregma -1.58 = 2 cells<br>bregma -1.70 = 3 cells<br>bregma -1.82 = 1 cell<br>CeL:<br>bregma -1.06 = 3 cells<br>bregma -1.34 = 2 cells<br>bregma -1.46 = 7 cells<br>bregma -1.58 = 1 cell<br>bregma -1.70 = 3 cells<br>bregma -1.94 = 2 cells | CeC:<br>slope = -14.14; y-intercept = -12.20;<br>x-intercept = -0.8624; $r^2 = 0.5031$ ; $F_{(1,12)} = 12.15$ ;<br>p = 0.0045<br>CeL:<br>slope = 4.001; y-intercept = 12.37;<br>x-intercept = -3.091; $r^2 = 0.04838$ ; $F_{(1,16)} = 0.8135$ ;<br>p = 0.3805 |
| 6Cii (# of APs LF)              | no assumptions made about normality      | linear regression                                    | CeC:<br>bregma -0.94 = 1 cell<br>bregma -1.06 = 4 cells<br>bregma -1.46 = 2 cells<br>bregma -1.58 = 3 cells<br>CeL:<br>bregma -1.06 = 1 cell<br>bregma -1.46 = 4 cells<br>bregma -1.70 = 1 cell<br>bregma -1.82 = 1 cell                                                                                                          | CeC:<br>slope = 2.696; y-intercept = 6.362;<br>x-intercept = -2.36; $r^2 = 0.1620$ ; $F_{(1,8)} = 1.546$ ;<br>p = 0.2489<br>CeL:<br>slope = -2.828; y-intercept = -0.6382;<br>x-intercept = -0.2257; $r^2 = 0.06547$ ; $F_{(1,5)} = 0.3503$ ;<br>p = 0.5797   |



cont. Table 3. Statistical Analyses

| Figure              | Data Structure                              | Type of Test          | Sample Size                                                                                                                                                                                                                                                                                                                                                          | Statistical Data                                                                                                                                                                                                                                                                                                           |
|---------------------|---------------------------------------------|-----------------------|----------------------------------------------------------------------------------------------------------------------------------------------------------------------------------------------------------------------------------------------------------------------------------------------------------------------------------------------------------------------|----------------------------------------------------------------------------------------------------------------------------------------------------------------------------------------------------------------------------------------------------------------------------------------------------------------------------|
| <b>Figure 6</b>     |                                             |                       |                                                                                                                                                                                                                                                                                                                                                                      |                                                                                                                                                                                                                                                                                                                            |
| 6Di (rheobase RS)   | no assumptions made about normality         | linear regression     | <p>CeC:<br/> bregma -1.06 = 5 cells<br/> bregma -1.34 = 1 cell<br/> bregma -1.46 = 2 cells<br/> bregma -1.58 = 2 cells<br/> bregma -1.70 = 3 cells<br/> bregma -1.82 = 1 cell</p> <p>CeL:<br/> bregma -1.06 = 3 cells<br/> bregma -1.34 = 2 cells<br/> bregma -1.46 = 7 cells<br/> bregma -1.58 = 1 cell<br/> bregma -1.70 = 3 cells<br/> bregma -1.94 = 2 cells</p> | <p>CeC:<br/> slope = 119.2; y-intercept = 254.3;<br/> x-intercept = -2.134; <math>r^2 = 0.5193</math>; <math>F_{(1, 12)} = 12.96</math>;<br/> p = 0.0036</p> <p>CeL:<br/> slope = -34.19; y-intercept = 44.65;<br/> x-intercept = 1.306; <math>r^2 = 0.08181</math>; <math>F_{(1, 15)} = 1.336</math>;<br/> p = 0.2657</p> |
| 6Dii (rheobase LF)  | no assumptions made about normality         | linear regression     | <p>CeC:<br/> bregma -0.94 = 1 cell<br/> bregma -1.06 = 4 cells<br/> bregma -1.46 = 2 cells<br/> bregma -1.58 = 3 cells</p> <p>CeL:<br/> bregma -1.06 = 1 cell<br/> bregma -1.46 = 4 cells<br/> bregma -1.70 = 1 cell<br/> bregma -1.82 = 1 cell</p>                                                                                                                  | <p>CeC:<br/> slope = -50.70; y-intercept = 138.9;<br/> x-intercept = 2.740; <math>r^2 = 0.063</math>; <math>F_{(1, 8)} = 0.5384</math>;<br/> p = 0.4840</p> <p>CeL:<br/> slope = 82.66; y-intercept = 320.2;<br/> x-intercept = -3.873; <math>r^2 = 0.1674</math>; <math>F_{(1, 5)} = 1.005</math>;<br/> p = 0.3621</p>    |
| 6Ei (latency RS)    | no assumptions made about normality         | linear regression     | <p>CeC:<br/> bregma -1.06 = 5 cells<br/> bregma -1.34 = 1 cell<br/> bregma -1.46 = 2 cells<br/> bregma -1.58 = 2 cells<br/> bregma -1.70 = 3 cells<br/> bregma -1.82 = 1 cell</p> <p>CeL:<br/> bregma -1.06 = 3 cells<br/> bregma -1.34 = 2 cells<br/> bregma -1.46 = 7 cells<br/> bregma -1.58 = 1 cell<br/> bregma -1.70 = 3 cells<br/> bregma -1.94 = 2 cells</p> | <p>CeC:<br/> slope = 406.1; y-intercept = 725.4;<br/> x-intercept = -1.786; <math>r^2 = 0.4858</math>; <math>F_{(1, 10)} = 9.447</math>;<br/> p = 0.0118</p> <p>CeL:<br/> slope = 28.59; y-intercept = 178.3;<br/> x-intercept = -6.235; <math>r^2 = 0.006</math>; <math>F_{(1, 14)} = 0.080</math>;<br/> p = 0.7808</p>   |
| 6Eii (latency LF)   | no assumptions made about normality         | linear regression     | <p>CeC:<br/> bregma -0.94 = 1 cell<br/> bregma -1.06 = 4 cells<br/> bregma -1.46 = 2 cells<br/> bregma -1.58 = 3 cells</p> <p>CeL:<br/> bregma -1.06 = 1 cell<br/> bregma -1.46 = 4 cells<br/> bregma -1.70 = 1 cell<br/> bregma -1.82 = 1 cell</p>                                                                                                                  | <p>CeC:<br/> slope = -8.872; y-intercept = 208.5;<br/> x-intercept = 23.51; <math>r^2 = 0.001</math>; <math>F_{(1, 7)} = 0.010</math>;<br/> p = 0.9234</p> <p>CeL:<br/> slope = -130.9; y-intercept = 73.09;<br/> x-intercept = 0.5584; <math>r^2 = 0.026</math>; <math>F_{(1, 4)} = 0.1087</math>;<br/> p = 0.7582</p>    |
| <b>Figure 7</b>     |                                             |                       |                                                                                                                                                                                                                                                                                                                                                                      |                                                                                                                                                                                                                                                                                                                            |
| 7C (Sholl analysis) | two factors (cell type and radial distance) | Two-way ANOVA with RM | <p>PKC<math>\delta^+</math> = 7 cells<br/> Som<math>^+</math> = 6 cells</p>                                                                                                                                                                                                                                                                                          | <p>cell type: <math>F_{(1, 11)} = 11.05</math>; p = 0.0068<br/> radial distance: <math>F_{(2,209, 24,30)} = 15.52</math>; p &lt; 0.0001</p>                                                                                                                                                                                |

cont. Table 3. Statistical Analyses

| Figure                       | Data Structure                                     | Type of Test                                                            | Sample Size                                                       | Statistical Data                                                                                                                                                                                                                                                                                                                                                                                                                                                                                                                                                             |
|------------------------------|----------------------------------------------------|-------------------------------------------------------------------------|-------------------------------------------------------------------|------------------------------------------------------------------------------------------------------------------------------------------------------------------------------------------------------------------------------------------------------------------------------------------------------------------------------------------------------------------------------------------------------------------------------------------------------------------------------------------------------------------------------------------------------------------------------|
| <b>Figure 7</b>              |                                                    |                                                                         |                                                                   |                                                                                                                                                                                                                                                                                                                                                                                                                                                                                                                                                                              |
| 7D (# dendrites)             | two factors (cell type and dendritic branch order) | Two-way ANOVA with RM, <i>posthoc</i> Tukey's multiple comparisons test | PKCδ <sup>+</sup> = 7 cells<br>Som <sup>+</sup> = 6 cells         | Two-way ANOVA:<br>cell type: $F_{(1, 11)} = 11.85$ ; $p = 0.0055$<br>dendritic branch order: $F_{(1,286, 14, 14)} = 5.824$ ; $p = 0.0236$<br><i>posthoc</i> Tukey's test:<br>PKCδ <sup>+</sup> primary v secondary dendrites: $p = 0.1497$<br>PKCδ <sup>+</sup> primary v tertiary dendrites: $p = 0.9342$<br>PKCδ <sup>+</sup> secondary v tertiary dendrites: $p = 0.7940$<br>Som <sup>+</sup> primary v secondary dendrites: $p = 0.0037$<br>Som <sup>+</sup> primary v tertiary dendrites: $p = 0.0277$<br>Som <sup>+</sup> secondary v tertiary dendrites: $p = 0.7567$ |
| 7E (dendrite length)         | two factors (cell type and dendritic branch order) | Mixed-effects model, <i>posthoc</i> Tukey's multiple comparisons test   | PKCδ <sup>+</sup> = 7 cells<br>Som <sup>+</sup> = 6 cells         | Mixed-effects:<br>cell type: $F_{(1, 11)} = 4.820$ ; $p = 0.0505$<br>dendritic branch order: $F_{(1,320, 13,20)} = 19.30$ ; $p = 0.0004$<br><i>posthoc</i> Tukey's test:<br>PKCδ <sup>+</sup> primary v secondary dendrites: $p = 0.0029$<br>PKCδ <sup>+</sup> primary v tertiary dendrites: $p = 0.0940$<br>PKCδ <sup>+</sup> secondary v tertiary dendrites: $p = 0.5862$<br>Som <sup>+</sup> primary v secondary dendrites: $p = 0.1438$<br>Som <sup>+</sup> primary v tertiary dendrites: $p = 0.0062$<br>Som <sup>+</sup> secondary v tertiary dendrites: $p = 0.0899$  |
| 7F (spine density)           | two factors (cell type and dendritic branch order) | Mixed-effects model, <i>posthoc</i> Tukey's multiple comparisons test   | PKCδ <sup>+</sup> = 7 cells<br>Som <sup>+</sup> = 6 cells         | Mixed-effects:<br>cell type: $F_{(1, 11)} = 3.730$ ; $p = 0.0796$<br>dendritic branch order: $F_{(1,046, 10,46)} = 8.740$ ; $p = 0.0131$<br><i>posthoc</i> Tukey's test:<br>PKCδ <sup>+</sup> primary v secondary dendrites: $p = 0.0873$<br>PKCδ <sup>+</sup> primary v tertiary dendrites: $p = 0.9562$<br>PKCδ <sup>+</sup> secondary v tertiary dendrites: $p = 0.4953$<br>Som <sup>+</sup> primary v secondary dendrites: $p = 0.0227$<br>Som <sup>+</sup> primary v tertiary dendrites: $p = 0.0437$<br>Som <sup>+</sup> secondary v tertiary dendrites: $p = 0.0805$  |
| 7G (capacitance LF)          | normal distribution, different variances           | unpaired t-test with Welch's correction (two-tailed)                    | PKCδ <sup>+</sup> LF = 19 cells<br>Som <sup>+</sup> LF = 9 cells  | $t = 3.483$ ; $df = 25.33$ ; $p = 0.0018$ ;<br>$\eta^2 = 0.3238$                                                                                                                                                                                                                                                                                                                                                                                                                                                                                                             |
| 7H (capacitance v spikes LF) | no assumptions made about normality                | linear regression                                                       | $n = 27$ (18 PKCδ <sup>+</sup> + 9 Som <sup>+</sup> )             | slope = -0.0352; y-intercept = 10.87;<br>x-intercept = 308.6; $r^2 = 0.2876$ ; $F_{(1, 25)} = 10.09$ ;<br>$p = 0.0039$                                                                                                                                                                                                                                                                                                                                                                                                                                                       |
| 7I (capacitance RS)          | normal distribution, different variances           | unpaired t-test with Welch's correction (two-tailed)                    | PKCδ <sup>+</sup> RS = 36 cells<br>Som <sup>+</sup> RS = 13 cells | $t = 1.665$ ; $df = 36.78$ ; $p = 0.1045$ ;<br>$\eta^2 = 0.07006$                                                                                                                                                                                                                                                                                                                                                                                                                                                                                                            |
| 7H (capacitance v spikes RS) | no assumptions made about normality                | linear regression                                                       | $n = 48$ (35 PKCδ <sup>+</sup> + 13 Som <sup>+</sup> )            | slope = -0.0837; y-intercept = 19.47;<br>x-intercept = 232.6; $r^2 = 0.3189$ ; $F_{(1, 46)} = 21.54$ ;<br>$p < 0.0001$                                                                                                                                                                                                                                                                                                                                                                                                                                                       |
| <b>Figure 8</b>              |                                                    |                                                                         |                                                                   |                                                                                                                                                                                                                                                                                                                                                                                                                                                                                                                                                                              |
| 8Ai (acetone)                | non-normal distribution                            | Mann-Whitney U test                                                     | ipsilateral = 21 mice<br>contralateral = 21 mice                  | $p < 0.0001$ (two-tailed); $U = 0$                                                                                                                                                                                                                                                                                                                                                                                                                                                                                                                                           |
| 8Aii (Hargreaves)            | non-normal distribution                            | Mann-Whitney U test                                                     | ipsilateral = 21 mice<br>contralateral = 21 mice                  | $p < 0.0001$ (two-tailed); $U = 2$                                                                                                                                                                                                                                                                                                                                                                                                                                                                                                                                           |
| 8Aiii (von Frey)             | non-normal distribution                            | Mann-Whitney U test                                                     | ipsilateral = 8 mice<br>contralateral = 8 mice                    | $p < 0.0002$ (two-tailed); $U = 0$                                                                                                                                                                                                                                                                                                                                                                                                                                                                                                                                           |
| 8Bi (IF curve LF)            | two factors (cell type and current injection)      | Mixed-effects model                                                     | PKCδ <sup>+</sup> = 12 cells<br>Som <sup>+</sup> = 7 cells        | cell type: $F_{(1, 17)} = 1.814$ ; $p = 0.1957$<br>current injection: $F_{(1,378, 23)} = 124.6$ ; $p < 0.0001$                                                                                                                                                                                                                                                                                                                                                                                                                                                               |
| 8Bii (IF curve RS)           | two factors (cell type and current injection)      | Mixed-effects model                                                     | PKCδ <sup>+</sup> = 18 cells<br>Som <sup>+</sup> = 21 cells       | cell type: $F_{(1, 37)} = 0.001$ ; $p = 0.9739$<br>current injection: $F_{(1,549, 55,5)} = 144.8$ ; $p < 0.0001$                                                                                                                                                                                                                                                                                                                                                                                                                                                             |
| 8Ci (APs at 180 pA LF)       | non-normal distribution                            | Mann-Whitney U test                                                     | PKCδ <sup>+</sup> = 12 cells<br>Som <sup>+</sup> = 7 cells        | $p = 0.0314$ (two-tailed); $U = 17$                                                                                                                                                                                                                                                                                                                                                                                                                                                                                                                                          |
| 8Cii (APs at 360 pA LF)      | non-normal distribution                            | Mann-Whitney U test                                                     | PKCδ <sup>+</sup> = 11 cells<br>Som <sup>+</sup> = 7 cells        | $p = 0.8788$ (two-tailed); $U = 36.50$                                                                                                                                                                                                                                                                                                                                                                                                                                                                                                                                       |

cont. Table 3. Statistical Analyses

| Figure                     | Data Structure                           | Type of Test                                         | Sample Size                                                 | Statistical Data                                         |
|----------------------------|------------------------------------------|------------------------------------------------------|-------------------------------------------------------------|----------------------------------------------------------|
| <b>Figure 8</b>            |                                          |                                                      |                                                             |                                                          |
| 8Ciii (APs at 100 pA RS)   | non-normal distribution                  | Mann-Whitney U test                                  | PKCδ <sup>+</sup> = 18 cells<br>Som <sup>+</sup> = 21 cells | p = 0.4719 (two-tailed); U = 163.5                       |
| 8Civ (APs at 200 pA RS)    | normal distribution, different variances | unpaired t-test with Welch's correction (two-tailed) | PKCδ <sup>+</sup> = 16 cells<br>Som <sup>+</sup> = 20 cells | t = 0.7728; df = 28.89; p = 0.4459; eta squared = 0.0203 |
| <b>Table 1</b>             |                                          |                                                      |                                                             |                                                          |
| V <sub>rest</sub> LF       | normal distribution, different variances | unpaired t-test with Welch's correction (two-tailed) | Na = 9 cells<br>Ac = 8 cells                                | t = 0.3887; df = 10.42; p = 0.7053; eta squared = 0.0143 |
| V <sub>rest</sub> RS       | normal distribution, same variances      | unpaired t-test (two-tailed)                         | Na = 17 cells<br>Ac = 18 cells                              | t = 2.920; df = 33; p = 0.0063; eta squared = 0.2052     |
| R <sub>in</sub> LF         | normal distribution, different variances | unpaired t-test with Welch's correction (two-tailed) | Na = 9 cells<br>Ac = 9 cells                                | t = 0.3179; df = 11.09; p = 0.7565; eta squared = 0.0090 |
| R <sub>in</sub> RS         | normal distribution, same variances      | unpaired t-test (two-tailed)                         | Na = 17 cells<br>Ac = 18 cells                              | t = 0.7474; df = 33; p = 0.4601; eta squared = 0.0167    |
| rheobase LF                | normal distribution, different variances | unpaired t-test with Welch's correction (two-tailed) | Na = 9 cells<br>Ac = 9 cells                                | t = 0.0923; df = 10.98; p = 0.9282; eta squared = 0.001  |
| rheobase RS                | non-normal distribution                  | unpaired t-test (two-tailed)                         | Na = 17 cells<br>Ac = 19 cells                              | p = 0.6639 (two-tailed); U = 147.5                       |
| latency LF                 | normal distribution, same variances      | unpaired t-test (two-tailed)                         | Na = 8 cells<br>Ac = 7 cells                                | t = 0.3191; df = 13; p = 0.7547; eta squared = 0.008     |
| latency RS                 | normal distribution, same variances      | unpaired t-test (two-tailed)                         | Na = 15 cells<br>Ac = 15 cells                              | t = 1.640; df = 28; p = 0.1122; eta squared = 0.088      |
| ISI LF                     | non-normal distribution                  | Mann-Whitney U test                                  | Na = 8 cells<br>Ac = 7 cells                                | p = 0.0003; U = 0                                        |
| ISI RS                     | normal distribution, same variances      | unpaired t-test (two-tailed)                         | Na = 17 cells<br>Ac = 18 cells                              | t = 10.38; df = 33; p < 0.0001; eta squared = 0.7656     |
| amplitude accommodation LF | normal distribution, same variances      | unpaired t-test (two-tailed)                         | Na = 9 cells<br>Ac = 7 cells                                | t = 1.170; df = 14; p = 0.2616; eta squared = 0.089      |
| amplitude accommodation RS | normal distribution, different variances | unpaired t-test with Welch's correction (two-tailed) | Na = 14 cells<br>Ac = 20 cells                              | t = 4.787; df = 22.08; p < 0.0001; eta squared = 0.509   |
| width accommodation LF     | non-normal distribution                  | Mann-Whitney U test                                  | Na = 9 cells<br>Ac = 7 cells                                | p > 0.9999 (two-tailed); U = 31                          |
| width accommodation RS     | non-normal distribution                  | Mann-Whitney U test                                  | Na = 12 cells<br>Ac = 16 cells                              | p = 0.3470 (two-tailed); U = 75                          |
| AHP accommodation LF       | normal distribution, same variances      | unpaired t-test (two-tailed)                         | Na = 9 cells<br>Ac = 7 cells                                | t = 0.1568; df = 14; p = 0.8776; eta squared = 0.0018    |
| AHP accommodation RS       | normal distribution, same variances      | unpaired t-test (two-tailed)                         | Na = 12 cells<br>Ac = 16 cells                              | t = 1.740; df = 34; p = 0.0908; eta squared = 0.082      |
| I <sub>threshold</sub> LF  | normal distribution, same variances      | unpaired t-test (two-tailed)                         | Na = 9 cells<br>Ac = 7 cells                                | t = 0.5140; df = 14; p = 0.6153; eta squared = 0.0185    |
| I <sub>threshold</sub> RS  | non-normal distribution                  | Mann-Whitney U test                                  | Na = 13 cells<br>Ac = 18 cells                              | p = 0.2218 (two-tailed); U = 86                          |
| V <sub>threshold</sub> LF  | normal distribution, same variances      | unpaired t-test (two-tailed)                         | Na = 9 cells<br>Ac = 7 cells                                | t = 0.4831; df = 14; p = 0.6365; eta squared = 0.016     |
| V <sub>threshold</sub> RS  | normal distribution, same variances      | unpaired t-test (two-tailed)                         | Na = 13 cells<br>Ac = 18 cells                              | t = 0.50904; df = 29; p = 0.5595; eta squared = 0.012    |
| rise LF                    | normal distribution, same variance       | unpaired t-test (two-tailed)                         | Na = 9 cells<br>Ac = 7 cells                                | t = 0.5678; df = 14; p = 0.5792; eta squared = 0.023     |
| rise RS                    | normal distribution, same variance       | unpaired t-test (two-tailed)                         | Na = 13 cells<br>Ac = 18 cells                              | t = 1.089; df = 29; p = 0.2851; eta squared = 0.039      |
| decay LF                   | non-normal distribution                  | Mann-Whitney U test                                  | Na = 9 cells<br>Ac = 7 cells                                | p > 0.9999 (two-tailed); U = 31.50                       |

cont. Table 3. Statistical Analyses

| Figure                                | Data Structure                           | Type of Test                                         | Sample Size                                                 | Statistical Data                                        |
|---------------------------------------|------------------------------------------|------------------------------------------------------|-------------------------------------------------------------|---------------------------------------------------------|
| <b>Table 1</b>                        |                                          |                                                      |                                                             |                                                         |
| decay RS                              | normal distribution, different variances | unpaired t-test with Welch's correction (two-tailed) | Na = 13 cells<br>Ac = 18 cells                              | t = 0.007; df = 23.94; p = 0.9946; eta squared = 0      |
| width LF                              | non-normal distribution                  | Mann-Whitney U test                                  | Na = 9 cells<br>Ac = 7 cells                                | p = 0.6065 (two-tailed); U = 26                         |
| width RS                              | normal distribution, different variances | unpaired t-test with Welch's correction (two-tailed) | Na = 13 cells<br>Ac = 18 cells                              | t = 0.4235; df = 24.70; p = 0.6756; eta squared = 0.007 |
| AHP LF                                | non-normal distribution                  | Mann-Whitney U test                                  | Na = 9 cells<br>Ac = 7 cells                                | t = 1.277; df = 14; p = 0.2225; eta squared = 0.1043    |
| AHP RS                                | non-normal distribution                  | Mann-Whitney U test                                  | Na = 13 cells<br>Ac = 18 cells                              | p = 0.1348 (two-tailed); U = 79                         |
| <b>Figure 2 - figure supplement 1</b> |                                          |                                                      |                                                             |                                                         |
| V <sub>sag</sub> LF                   | normal distribution, same variance       | unpaired t-test (two-tailed)                         | PKCδ <sup>+</sup> = 18 cells<br>Som <sup>+</sup> = 9 cells  | t = 1.723; df = 25; p = 0.0971; eta squared = 0.1062    |
| V <sub>sag</sub> RS                   | non-normal distribution                  | Mann-Whitney U test                                  | PKCδ <sup>+</sup> = 33 cells<br>Som <sup>+</sup> = 13 cells | p = 0.4961 (two-tailed); U = 186                        |
| <b>Figure 8 - figure supplement 1</b> |                                          |                                                      |                                                             |                                                         |
| V <sub>rest</sub> LF pain             | normal distribution, same variance       | unpaired t-test (two-tailed)                         | PKCδ <sup>+</sup> = 12 cells<br>Som <sup>+</sup> = 7 cells  | t = 1.317; df = 17; p = 0.2052; eta squared = 0.09262   |
| V <sub>rest</sub> RS pain             | normal distribution, same variance       | unpaired t-test (two-tailed)                         | PKCδ <sup>+</sup> = 18 cells<br>Som <sup>+</sup> = 21 cells | t = 1.165; df = 37; p = 0.2515; eta squared = 0.0354    |
| R <sub>in</sub> LF pain               | non-normal distribution                  | Mann-Whitney U test                                  | PKCδ <sup>+</sup> = 12 cells<br>Som <sup>+</sup> = 7 cells  | p = 0.1195 (two-tailed); U = 23                         |
| R <sub>in</sub> RS pain               | normal distribution, same variance       | unpaired t-test (two-tailed)                         | PKCδ <sup>+</sup> = 18 cells<br>Som <sup>+</sup> = 21 cells | t = 1.580; df = 37; p = 0.1227; eta squared = 0.0632    |
| rheobase LF pain                      | normal distribution, different variances | unpaired t-test with Welch's correction (two-tailed) | PKCδ <sup>+</sup> = 12 cells<br>Som <sup>+</sup> = 7 cells  | t = 2.050; df = 7.092; p = 0.0790; eta squared = 0.3721 |
| rheobase RS pain                      | normal distribution, same variance       | unpaired t-test (two-tailed)                         | PKCδ <sup>+</sup> = 18 cells<br>Som <sup>+</sup> = 21 cells | t = 1.466; df = 37; p = 0.1510; eta squared = 0.0549    |
| latency LF pain                       | non-normal distribution                  | Mann-Whitney U test                                  | PKCδ <sup>+</sup> = 12 cells<br>Som <sup>+</sup> = 6 cells  | p = 0.9636 (two-tailed); U = 35                         |
| latency RS pain                       | non-normal distribution                  | Mann-Whitney U test                                  | PKCδ <sup>+</sup> = 18 cells<br>Som <sup>+</sup> = 21 cells | p = 0.8564 (two-tailed); U = 182                        |

**Table 3. Statistical Analyses.** Detailed information about data structure, statistical tests and results, and sample sizes. LF: late-firing; RS: regular spiking; IF: current-frequency plot; RM: repeated measures; F<sub>(DFn, DFd)</sub>: degree of freedom for the numerator of the F ratio, for the denominator of the F ratio; df: degrees of freedom; R<sub>in</sub>: input resistance; V<sub>rest</sub>: resting membrane potential; AHP: afterhyperpolarization; I<sub>threshold</sub>: current threshold; V<sub>threshold</sub>: voltage threshold; AP: action potential; Na: non-accommodating; Ac: accommodating; ISI: interspike interval; V<sub>sag</sub>: voltage sag.

682 This research was supported by the National Center for Complementary and Integrative Health  
683 Intramural Research Program. We would like to thank Drs. Hugo Tejeda, Mario Penzo and Yavin  
684 Shaham for comments on this manuscript and Dr. Ted Usdin and the Systems Neuroscience  
685 Imaging Resource of the National Institute of Mental Health for making possible the morphological  
686 reconstruction and analysis of biocytin-filled cells. We would also like to thank the National  
687 Institutes of Neurological Disorder Mouse Facility staff for their vital work in animal husbandry.

#### 688 **COMPETING INTERESTS**

689 The authors declare no competing interests.

#### 690 **AUTHOR CONTRIBUTIONS**

691 Conceptualization, Y.C.; Methodology, Y.C., A.P.A. and S.V.; Investigation, A.P.A., A. K., H.-S.A.,  
692 J. J. B., T.D.W., S.V., Y. K. S, and S. M. G; Writing, Y.C. and A.P.A.; Supervision, Y. C.; Funding  
693 Acquisition, Y.C.

#### 694 **REFERENCES**

- 695 AGGLETON, J. P. 2000. *The amygdala : a functional analysis*, New York, Oxford University  
696 Press.
- 697 AMANO, T., AMIR, A., GOSWAMI, S. & PARE, D. 2012. Morphology, PKCdelta expression, and  
698 synaptic responsiveness of different types of rat central lateral amygdala neurons. *J Neurophysiol*,  
699 108, 3196-205.
- 700 BEAN, B. P. 2007. The action potential in mammalian central neurons. *Nat Rev Neurosci*, 8, 451-  
701 65.
- 702 BENBOUZID, M., PALLAGE, V., RAJALU, M., WALTISPERGER, E., DORIDOT, S., POISBEAU,  
703 P., FREUND-MERCIER, M. J. & BARROT, M. 2008. Sciatic nerve cuffing in mice: a model of  
704 sustained neuropathic pain. *Eur J Pain*, 12, 591-9.
- 705 BERNARD, J. F. & BESSON, J. M. 1990. The spino(trigemino)pontoamygdaloid pathway:  
706 electrophysiological evidence for an involvement in pain processes. *J Neurophysiol*, 63, 473-90.
- 707 CARRASQUILLO, Y. & GEREAU IV, R. W. 2007. Activation of the extracellular signal-regulated  
708 kinase in the amygdala modulates pain perception. *J Neurosci*, 27, 1543-51.

- 709 CHIENG, B. C., CHRISTIE, M. J. & OSBORNE, P. B. 2006. Characterization of neurons in the  
710 rat central nucleus of the amygdala: cellular physiology, morphology, and opioid sensitivity. *J*  
711 *Comp Neurol*, 497, 910-27.
- 712 CIOCCHI, S., HERRY, C., GRENIER, F., WOLFF, S. B., LETZKUS, J. J., VLACHOS, I.,  
713 EHRLICH, I., SPRENGEL, R., DEISSEROTH, K., STADLER, M. B., MULLER, C. & LUTHI, A.  
714 2010. Encoding of conditioned fear in central amygdala inhibitory circuits. *Nature*, 468, 277-82.
- 715 CONNORS, B. W. & REGEHR, W. G. 1996. Neuronal firing: does function follow form? *Curr Biol*,  
716 6, 1560-2.
- 717 COSTANTINI, I., GHOBIL, J. P., DI GIOVANNA, A. P., ALLEGRA MASCARO, A. L.,  
718 SILVESTRI, L., MULLENBROICH, M. C., ONOFRI, L., CONTI, V., VANZI, F., SACCONI, L.,  
719 GUERRINI, R., MARKRAM, H., IANNELLO, G. & PAVONE, F. S. 2015. A versatile clearing agent  
720 for multi-modal brain imaging. *Sci Rep*, 5, 9808.
- 721 DAVIS, M. & WHALEN, P. J. 2001. The amygdala: vigilance and emotion. *Mol Psychiatry*, 6, 13-  
722 34.
- 723 DUMONT, E. C., MARTINA, M., SAMSON, R. D., DROLET, G. & PARE, D. 2002. Physiological  
724 properties of central amygdala neurons: species differences. *Eur J Neurosci*, 15, 545-52.
- 725 GERTLER, T. S., CHAN, C. S. & SURMEIER, D. J. 2008. Dichotomous anatomical properties of  
726 adult striatal medium spiny neurons. *J Neurosci*, 28, 10814-24.
- 727 GILPIN, N. W., HERMAN, M. A. & ROBERTO, M. 2015. The central amygdala as an integrative  
728 hub for anxiety and alcohol use disorders. *Biol Psychiatry*, 77, 859-69.
- 729 HAN, S., SOLEIMAN, M. T., SODEN, M. E., ZWEIFEL, L. S. & PALMITER, R. D. 2015.  
730 Elucidating an Affective Pain Circuit that Creates a Threat Memory. *Cell*, 162, 363-74.
- 731 HAUBENSAK, W., KUNWAR, P. S., CAI, H., CIOCCHI, S., WALL, N. R., PONNUSAMY, R.,  
732 BIAG, J., DONG, H. W., DEISSEROTH, K., CALLAWAY, E. M., FANSELOW, M. S., LUTHI, A. &  
733 ANDERSON, D. J. 2010. Genetic dissection of an amygdala microcircuit that gates conditioned  
734 fear. *Nature*, 468, 270-6.
- 735 HUNT, S., SUN, Y., KUCUKDERELI, H., KLEIN, R. & SAH, P. 2017. Intrinsic Circuits in the Lateral  
736 Central Amygdala. *eNeuro*, 4.
- 737 HURST, J. L. & WEST, R. S. 2010. Taming anxiety in laboratory mice. *Nat Methods*, 7, 825-6.
- 738 JANAK, P. H. & TYE, K. M. 2015. From circuits to behaviour in the amygdala. *Nature*, 517, 284-  
739 92.
- 740 KIM, J., ZHANG, X., MURALIDHAR, S., LEBLANC, S. A. & TONEGAWA, S. 2017. Basolateral to  
741 Central Amygdala Neural Circuits for Appetitive Behaviors. *Neuron*, 93, 1464-1479 e5.
- 742 LI, H., PENZO, M. A., TANIGUCHI, H., KOPEC, C. D., HUANG, Z. J. & LI, B. 2013. Experience-  
743 dependent modification of a central amygdala fear circuit. *Nat Neurosci*, 16, 332-9.

- 744 LI, J. N. & SHEETS, P. L. 2018. The central amygdala to periaqueductal gray pathway comprises  
745 intrinsically distinct neurons differentially affected in a model of inflammatory pain. *J Physiol*, 596,  
746 6289-6305.
- 747 LI, J. N. & SHEETS, P. L. 2019. Spared nerve injury differentially alters parabrachial  
748 monosynaptic excitatory inputs to molecularly specific neurons in distinct subregions of the central  
749 amygdala. *Pain*.
- 750 LOPEZ DE ARMENTIA, M. & SAH, P. 2004. Firing properties and connectivity of neurons in the  
751 rat lateral central nucleus of the amygdala. *J Neurophysiol*, 92, 1285-94.
- 752 MA, C., ZHONG, P., LIU, D., BARGER, Z. K., ZHOU, L., CHANG, W. C., KIM, B. & DAN, Y. 2019.  
753 Sleep Regulation by Neurotensinergic Neurons in a Thalamo-Amygdala Circuit. *Neuron*, 103,  
754 323-334 e7.
- 755 MAINEN, Z. F. & SEJNOWSKI, T. J. 1996. Influence of dendritic structure on firing pattern in  
756 model neocortical neurons. *Nature*, 382, 363-6.
- 757 MARTINA, M., ROYER, S. & PARE, D. 1999. Physiological properties of central medial and  
758 central lateral amygdala neurons. *J Neurophysiol*, 82, 1843-54.
- 759 MCCULLOUGH, K. M., MORRISON, F. G., HARTMANN, J., CARLEZON, W. A., JR. &  
760 RESSLER, K. J. 2018. Quantified Coexpression Analysis of Central Amygdala Subpopulations.  
761 *eNeuro*, 5.
- 762 NEUGEBAUER, V., LI, W., BIRD, G. C. & HAN, J. S. 2004. The amygdala and persistent pain.  
763 *Neuroscientist*, 10, 221-34.
- 764 PAXINOS, G., FRANKLIN, K. B. J. & FRANKLIN, K. B. J. 2001. *The mouse brain in stereotaxic*  
765 *coordinates*, San Diego, Academic Press.
- 766 SCHIESS, M. C., CALLAHAN, P. M. & ZHENG, H. 1999. Characterization of the  
767 electrophysiological and morphological properties of rat central amygdala neurons in vitro. *J*  
768 *Neurosci Res*, 58, 663-73.
- 769 STIEFEL, K. M. & SEJNOWSKI, T. J. 2007. Mapping function onto neuronal morphology. *J*  
770 *Neurophysiol*, 98, 513-26.
- 771 SWIETEK, B., GUPTA, A., PRODDUTUR, A. & SANTHAKUMAR, V. 2016. Immunostaining of  
772 Biocytin-filled and Processed Sections for Neurochemical Markers. *J Vis Exp*.
- 773 VAN DER VELDEN, L., VAN HOOFT, J. A. & CHAMEAU, P. 2012. Altered dendritic complexity  
774 affects firing properties of cortical layer 2/3 pyramidal neurons in mice lacking the 5-HT3A  
775 receptor. *J Neurophysiol*, 108, 1521-8.
- 776 VEINANTE, P., YALCIN, I. & BARROT, M. 2013. The amygdala between sensation and affect: a  
777 role in pain. *J Mol Psychiatry*, 1, 9.
- 778 VENNIRO, M., CAPRIOLI, D., ZHANG, M., WHITAKER, L. R., ZHANG, S., WARREN, B. L.,  
779 CIFANI, C., MARCHANT, N. J., YIZHAR, O., BOSSERT, J. M., CHIAMULERA, C., MORALES,



- 780 M. & SHAHAM, Y. 2017. The Anterior Insular Cortex-->Central Amygdala Glutamatergic Pathway  
781 Is Critical to Relapse after Contingency Management. *Neuron*, 96, 414-427 e8.
- 782 VENNIRO, M., ZHANG, M., CAPRIOLI, D., HOOTS, J. K., GOLDEN, S. A., HEINS, C.,  
783 MORALES, M., EPSTEIN, D. H. & SHAHAM, Y. 2018. Volitional social interaction prevents drug  
784 addiction in rat models. *Nat Neurosci*, 21, 1520-1529.
- 785 WILSON, T. D., VALDIVIA, S., KHAN, A., AHN, H. S., ADKE, A. P., GONZALEZ, S. M.,  
786 SUGIMURA, Y. K. & CARRASQUILLO, Y. 2019. Dual and Opposing Functions of the Central  
787 Amygdala in the Modulation of Pain. *Cell Rep*, 29, 332-346 e5.
- 788 YU, K., GARCIA DA SILVA, P., ALBEANU, D. F. & LI, B. 2016. Central Amygdala Somatostatin  
789 Neurons Gate Passive and Active Defensive Behaviors. *J Neurosci*, 36, 6488-96.
- 790 ZALD, D. H. 2003. The human amygdala and the emotional evaluation of sensory stimuli. *Brain*  
791 *Res Brain Res Rev*, 41, 88-123.
- 792 ZHU, W. & PAN, Z. Z. 2004. Synaptic properties and postsynaptic opioid effects in rat central  
793 amygdala neurons. *Neuroscience*, 127, 871-9.
- 794

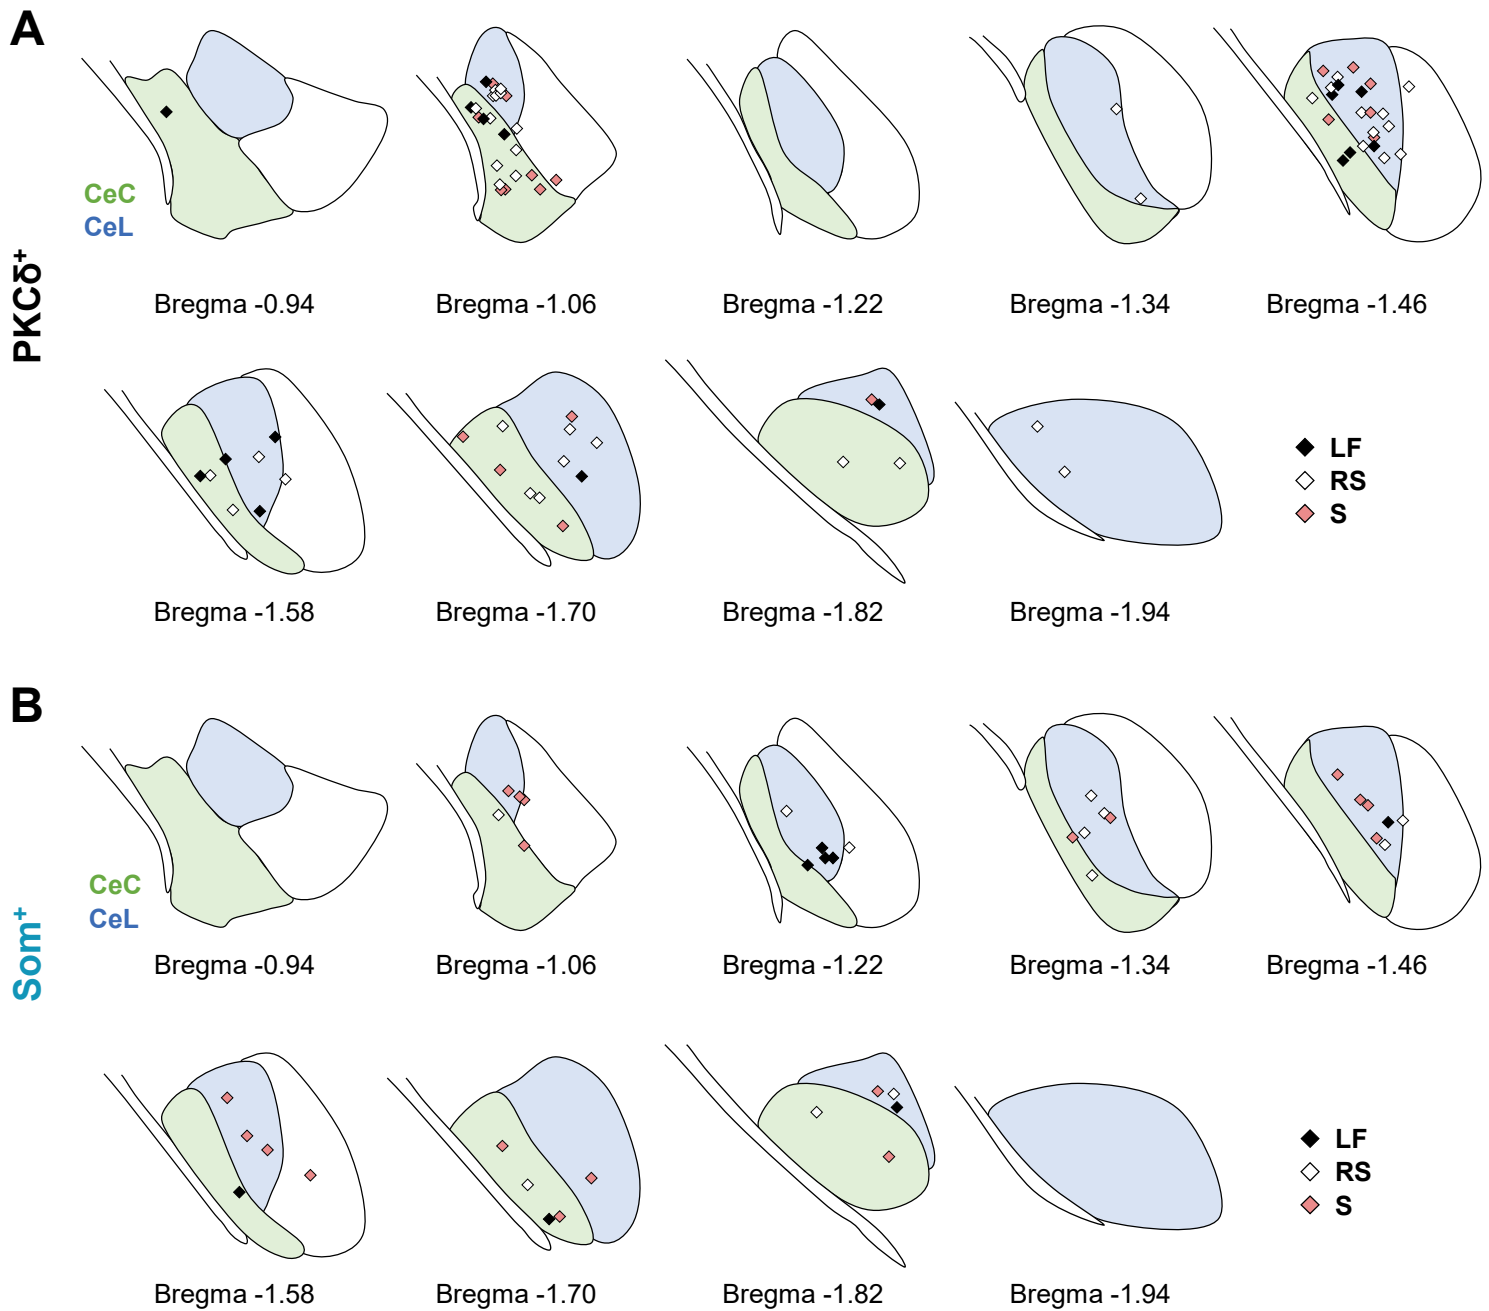

**Figure 1 – figure supplement 1. Anatomical location of electrophysiology recordings.** Rostro-caudal anatomical locations of recorded PKC $\delta$ <sup>+</sup> (**A**) and Som<sup>+</sup> (**B**) cells, represented as a schematic of the CeLC, created using Paxinos & Franklin, 2008. The capsular (CeC) and lateral (CeL) subdivisions of the central amygdala are shown in green and blue, respectively. LF = late-firing; RS = regular-spiking; S = spontaneous.

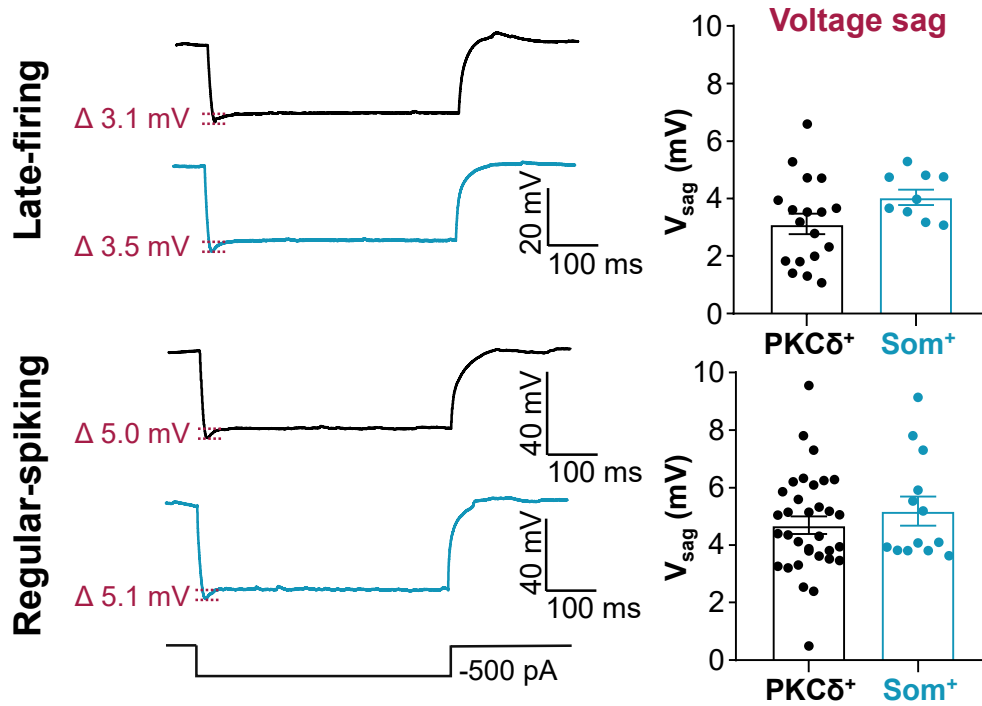

**Figure 2 – figure supplement 1. Voltage sag is indistinguishable in PKC $\delta^+$  and Som $^+$  cells.** Representative traces of late-firing (top) and regular-spiking (bottom) neurons in response to a 500 ms hyperpolarizing current injection, with PKC $\delta^+$  cells shown in black and Som $^+$  cells in blue. Values are reported as mean  $\pm$  S.E.M. For PKC $\delta^+$  cells:  $n = 18$  cells for late-firing and  $n = 33$  regular-spiking. For Som $^+$  cells:  $n = 9$  for late-firing and  $n = 13$  for regular-spiking. Voltage sag =  $V_{\text{sag}}$

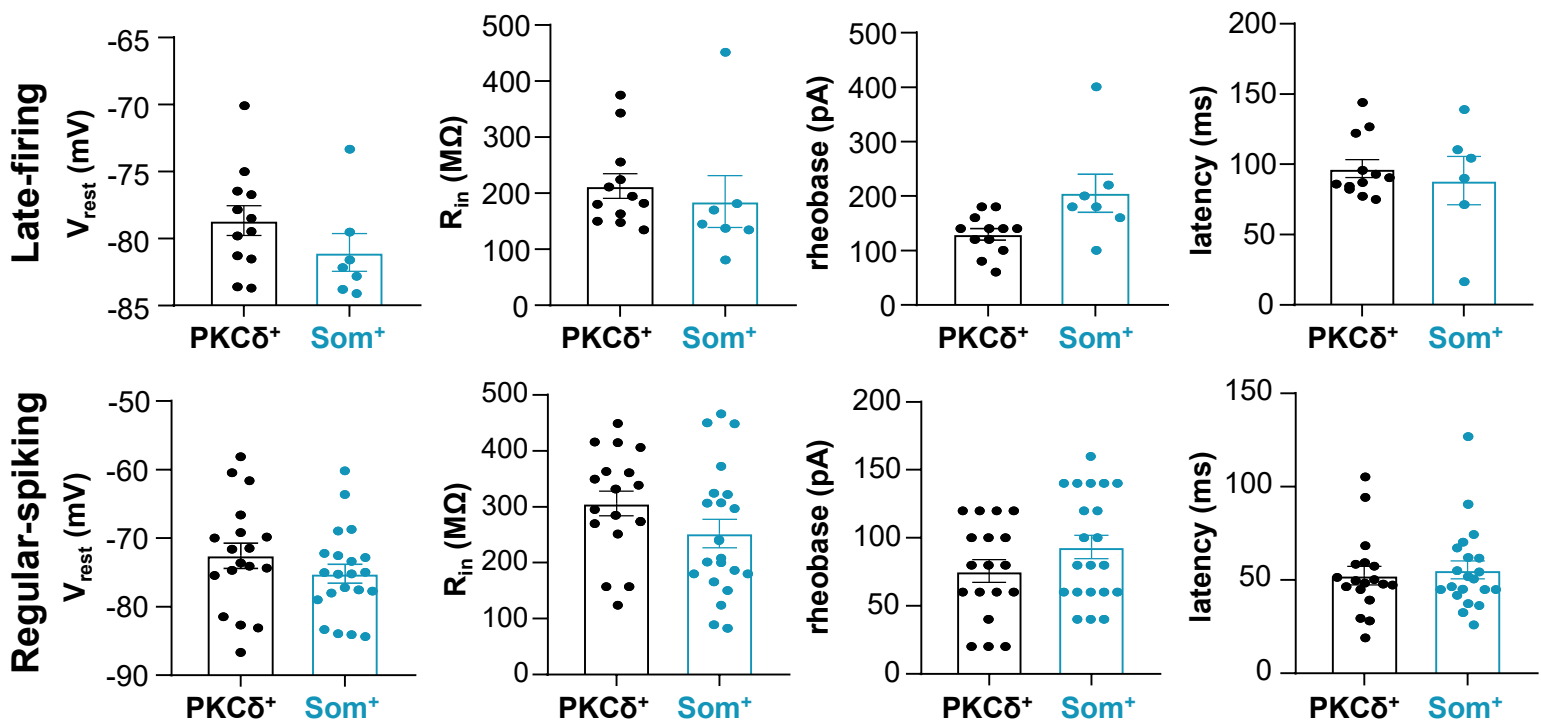

**Figure 8 – figure supplement 1. Passive membrane and repetitive firing properties of PKC $\delta^+$  and Som $^+$  cells following nerve injury.** All data are reported as mean  $\pm$  S.E.M. For PKC $\delta^+$  cells: n = 12 cells for late-firing and n = 18 regular-spiking. For Som $^+$  cells: n = 6-7 for late-firing and n = 21 for regular-spiking.  $V_{rest}$  = resting membrane potential;  $R_{in}$  = input resistance.
